# Supplementary material for: A rapid application emissions-to-impacts tool for scenario assessment: Probabilistic Regional Impacts from Model patterns and Emissions (PRIME)
Source: Copernicus journal article supplement (doi:10.5194/egusphere-2023-2932), 2024-02-26
Supplement: Supplementary file 1 [file egusphere-2023-2932-supplement.pdf]

# **Supplementary information for: A rapid application emissions-to-impacts tool for scenario assessment: Probabilistic Regional Impacts from Model patterns and Emissions (PRIME)**

Camilla Mathison<sup>1,3</sup>, Eleanor J. Burke<sup>1</sup>, Eszter Kovacs<sup>3</sup>, Gregory Munday<sup>1</sup>, Chris Huntingford<sup>2</sup>, Chris D. Jones<sup>1,7</sup>, Chris J Smith<sup>3,4</sup>, Norman J. Steinert<sup>5</sup>, Andy J Wiltshire<sup>1,6</sup>, Laila K. Gohar<sup>1</sup>, and Rebecca M. Varney<sup>6</sup>

<sup>1</sup>Met Office Hadley Centre, Exeter, UK

<sup>2</sup>UK Centre for Ecology and Hydrology, Wallingford, UK

<sup>3</sup>University of Leeds, Leeds, UK

<sup>4</sup>International Institute for Applied Systems Analysis (IIASA), Laxenburg, Austria

<sup>5</sup>NORCE Norwegian Research Centre, Bjerknes Centre for Climate Research, Bergen, Norway

<sup>6</sup>Faculty of Environment, Science and Economy, University of Exeter, Exeter, UK

<sup>7</sup>School of Geographical Sciences, University of Bristol, Bristol, UK

## **1 Introduction**

This is the supplementary information to accompany the paper: 'A rapid application emissions-to-impacts tool for scenario assessment: Probabilistic Regional Impacts from Model patterns and Emissions (PRIME)'.

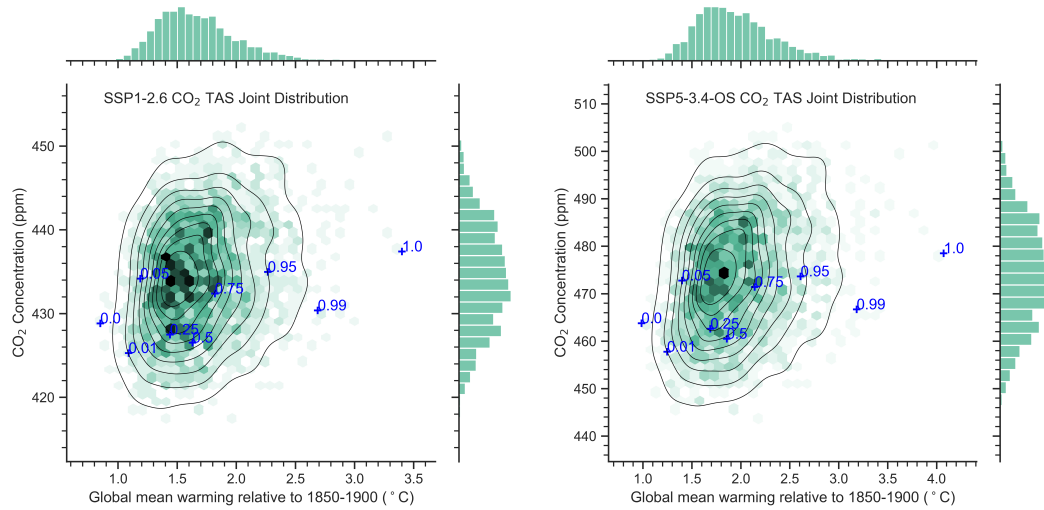

**Figure S1.** Joint distribution of Temperature (TAS) and CO<sub>2</sub> for SSP1-2.6 (left) and SSP5-3.4-OS (right) and the sub-selected percentiles (blue crosses) used to drive the JULES impacts model. Shades of green denote the density of points with individual histograms shown above and to the right of the main panel. 10% confidence intervals are shown by the contours.

## 2 Ensemble selection from temperature and CO<sub>2</sub> distribution

### 5 3 Evaluation of the patterns

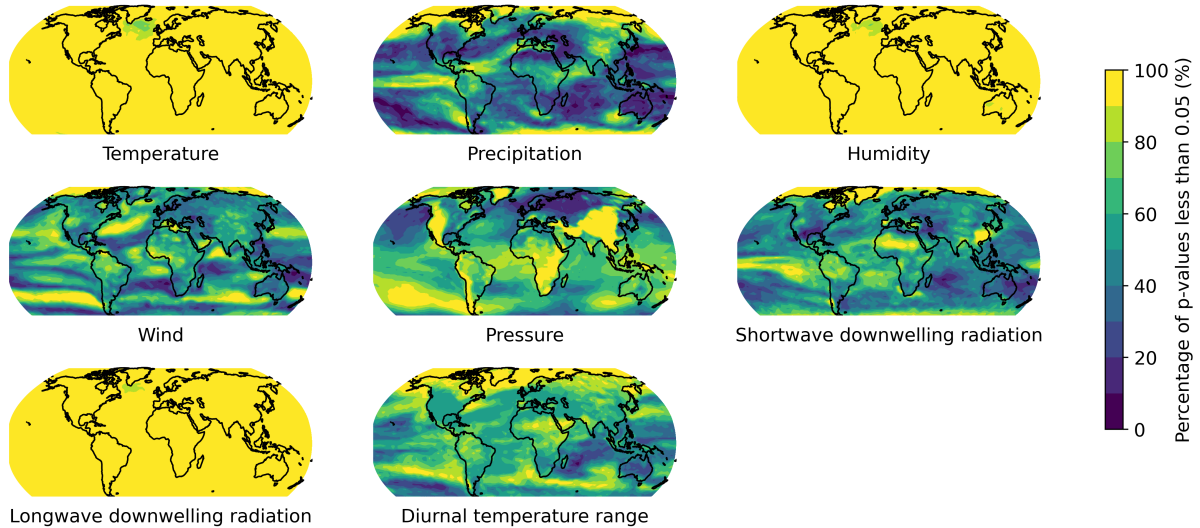

**Figure S2.** The percentage of the p-value for each JULES input variable (labelled) averaged over model and month for each pattern variable.

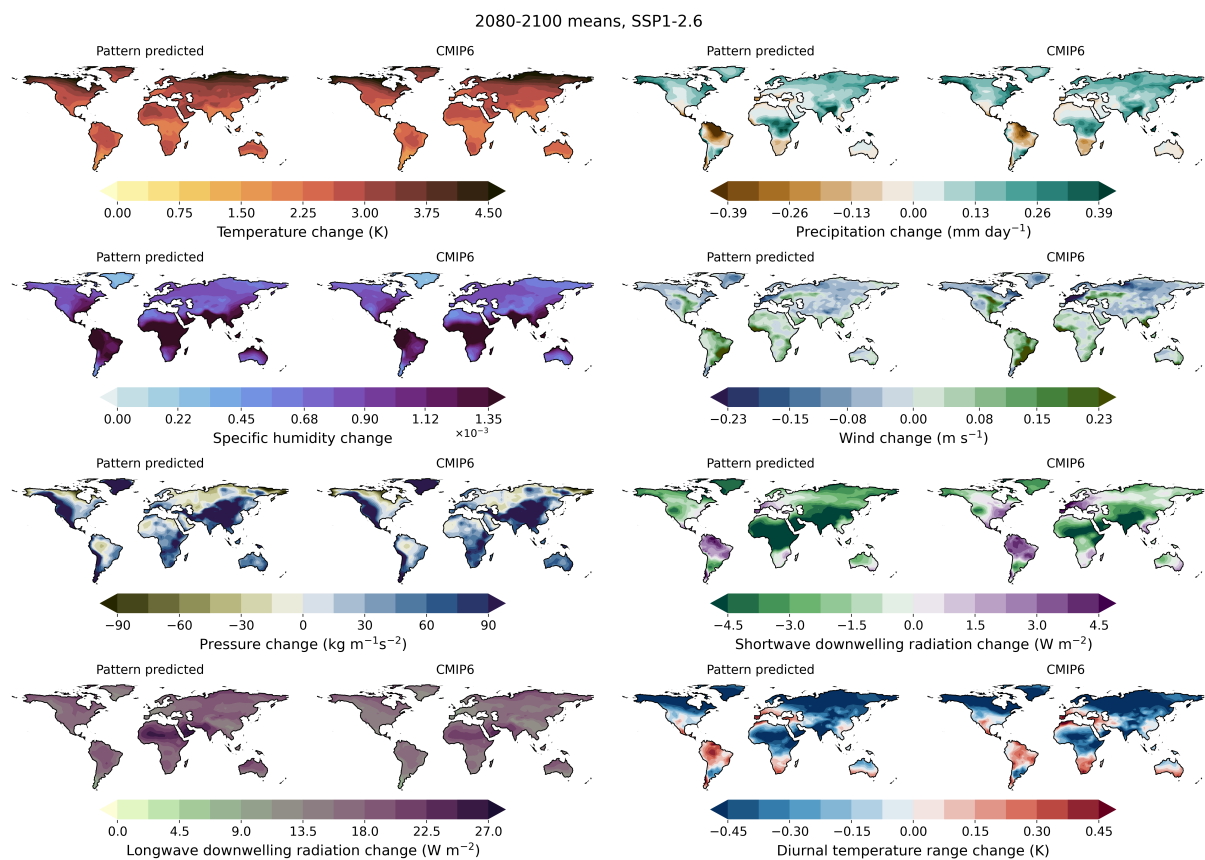

**Figure S3.** End of century changes (2080–2100) in each JULES input variable (labelled) for SSP1-2.6 predicted by patterns (left hand side of each variable panel) compared to CMIP6 values (right hand side of each variable panel). Plots shows the multi-model means.

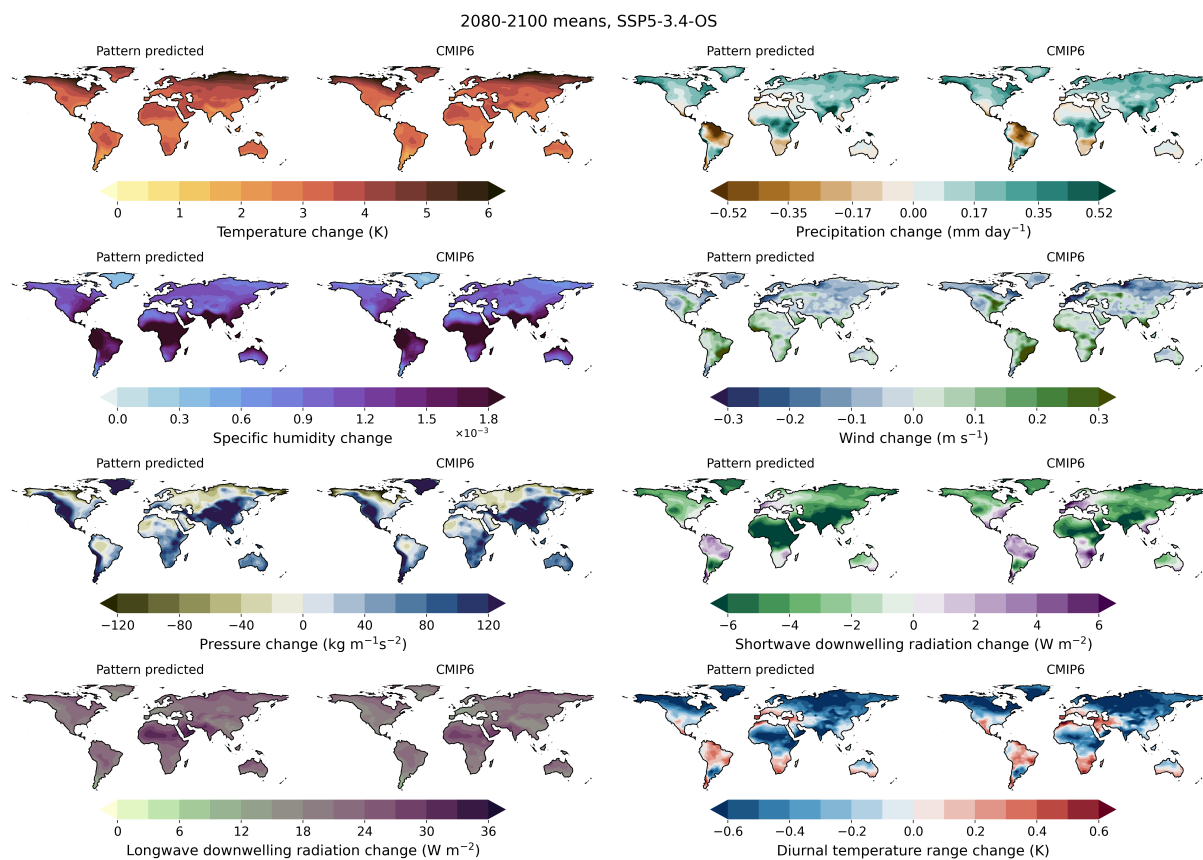

**Figure S4.** End of century changes (2080–2100) in each JULES input variable (labelled) for SSP5-3.4-OS predicted by patterns (left hand side of each variable panel) compared to CMIP6 values (right hand side of each variable panel). Plots shows the multi-model means.

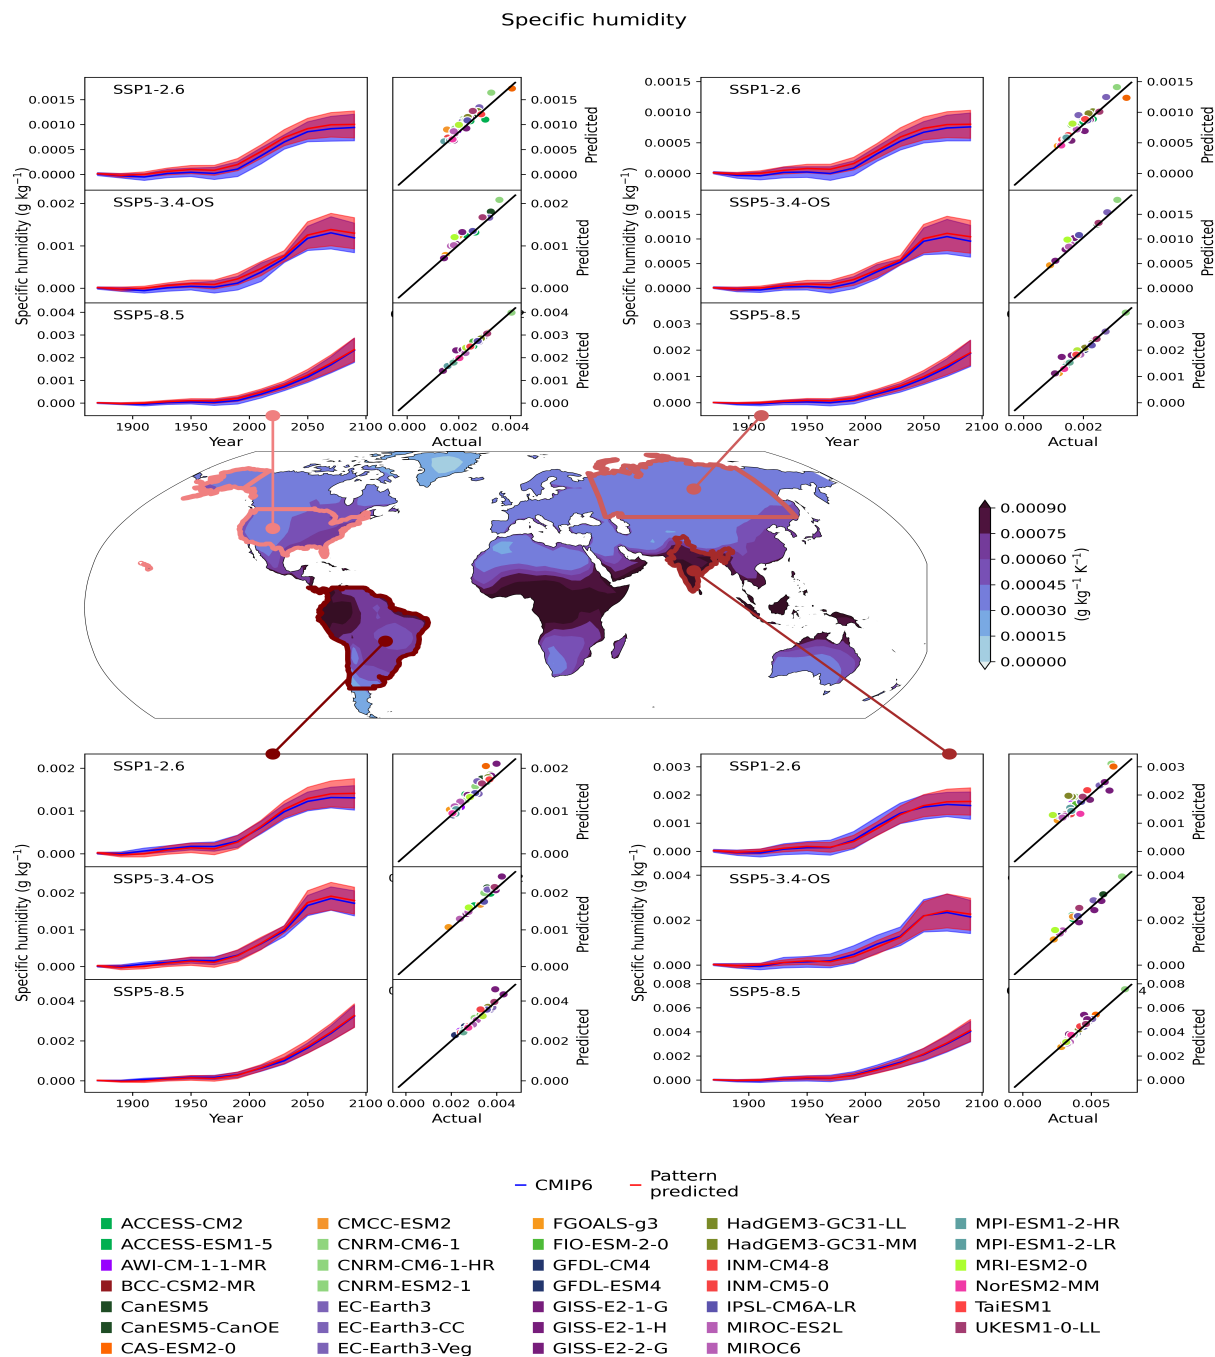

**Figure S5.** The central map shows the specific humidity pattern (where there is no hatching indicates that the models tend to agree on the sign of the change and with hatching to show where the models tend to disagree on the sign of the change), and subpanels for each region: North America, Siberia, South America and South Asia. The region subpanels show the specific humidity timeseries (left subpanel) and scatter plots (right subpanel) for each scenario; top: SSP1-2.6, middle: SSP5-3.4-OS and bottom: SSP5-8.5. The timeseries shows the PRIME patterns (blue plume) and the CMIP6 patterns (red plume). The scatter plots show the end of century values predicted by PRIME vs CMIP6 actual values for each model with the model colours shown at the bottom of the figure.

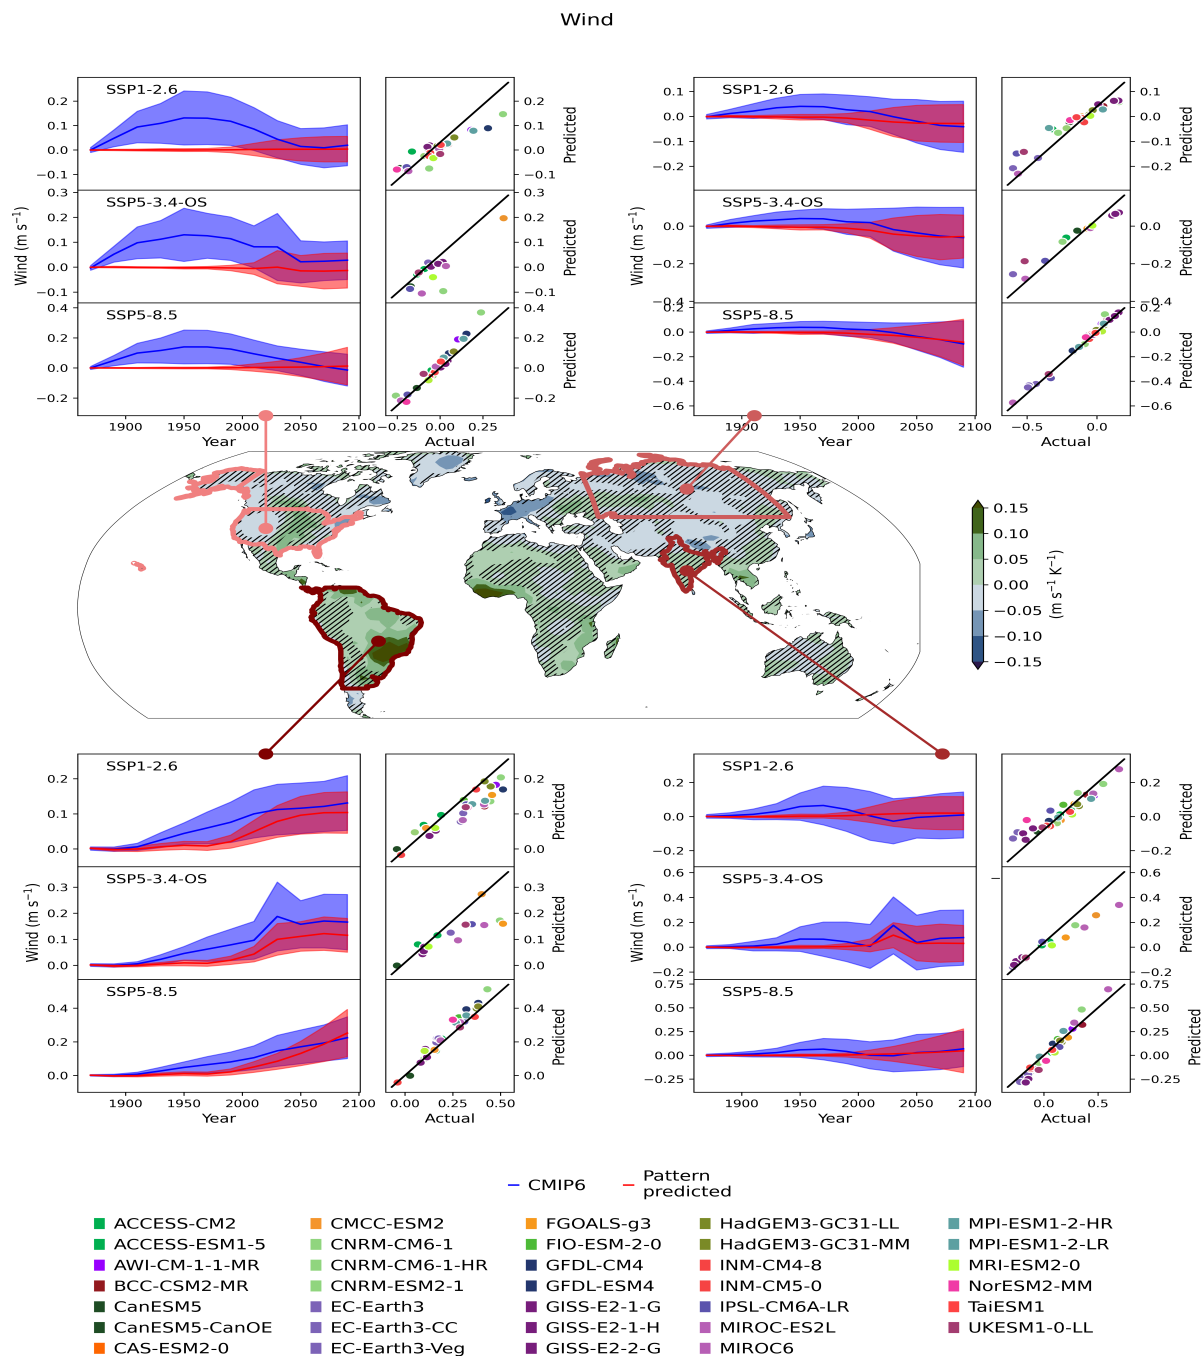

**Figure S6.** The central map shows the wind pattern (where there is no hatching indicates that the models tend to agree on the sign of the change and with hatching to show where the models tend to disagree on the sign of the change) and subpanels for each region: North America, Siberia, South America and South Asia. The region subpanels show the wind timeseries (left subpanel) and scatter plots (right subpanel) for each scenario; top: SSP1-2.6, middle: SSP5-3.4-OS and bottom: SSP5-8.5. The timeseries shows the PRIME patterns (blue plume) and the CMIP6 patterns (red plume). The scatter plots show the end of century values predicted by PRIME vs CMIP6 actual values for each model with the model colours shown at the bottom of the figure.

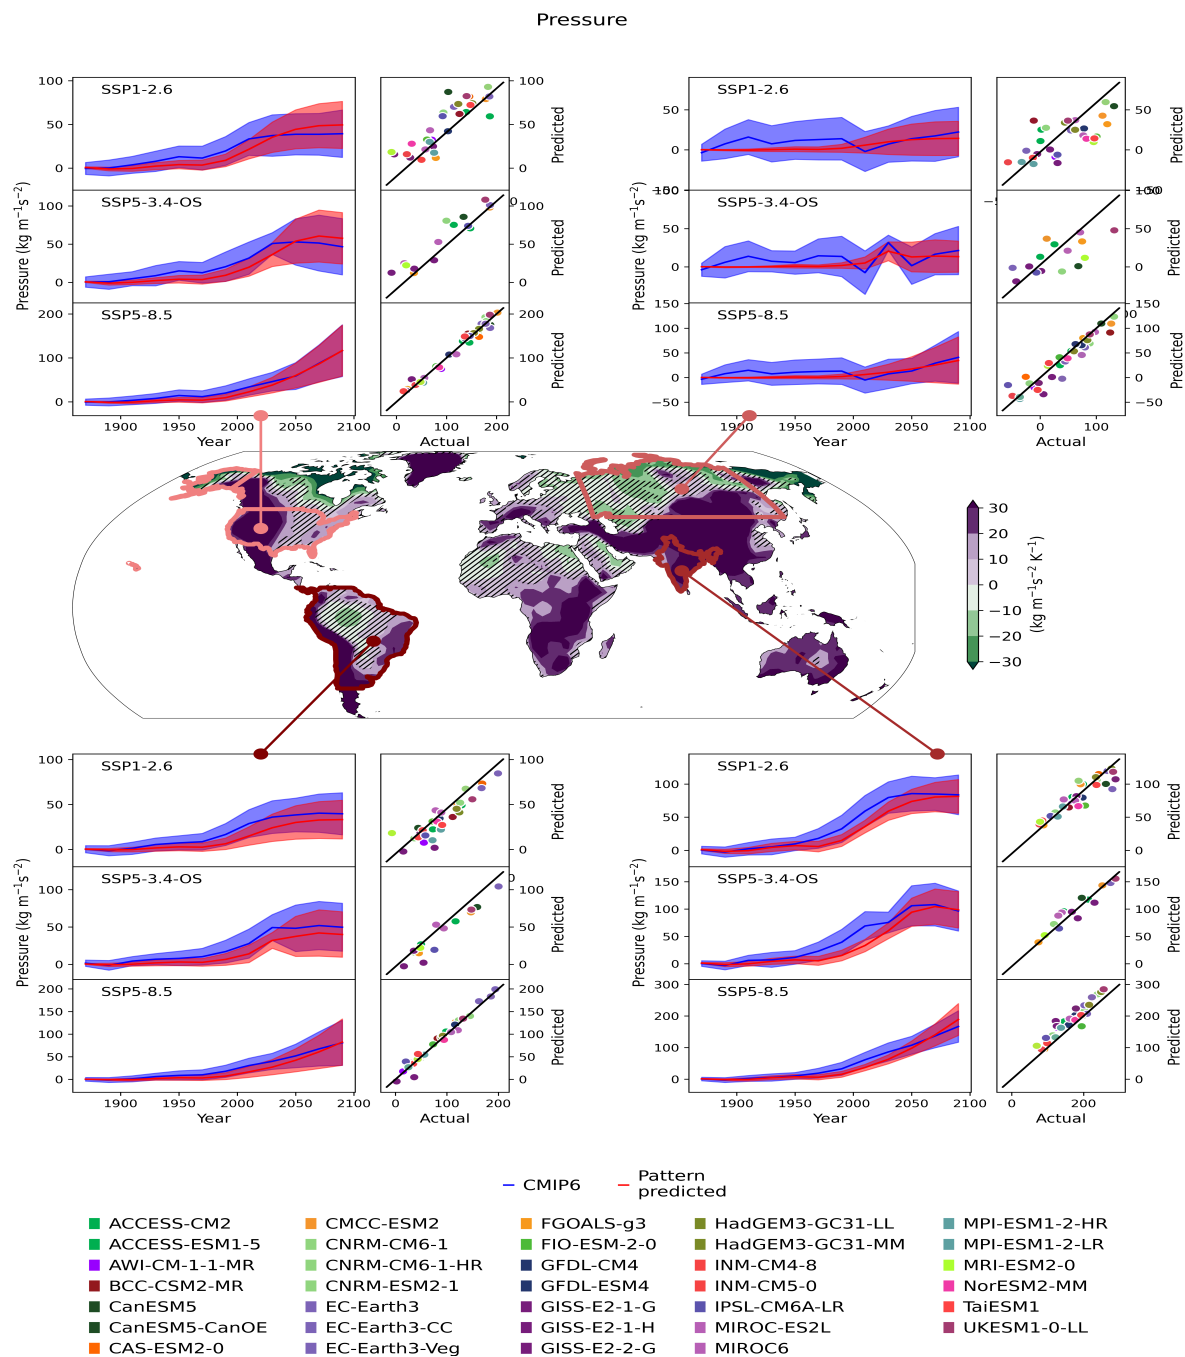

**Figure S7.** The central map shows the pressure pattern (where there is no hatching indicates that the models tend to agree on the sign of the change and with hatching to show where the models tend to disagree on the sign of the change) and subpanels for each region: North America, Siberia, South America and South Asia. The region subpanels show the pressure timeseries (left subpanel) and scatter plots (right subpanel) for each scenario; top: SSP1-2.6, middle: SSP5-3.4-OS and bottom: SSP5-8.5. The timeseries shows the PRIME patterns (blue plume) and the CMIP6 patterns (red plume). The scatter plots show the end of century values predicted by PRIME vs CMIP6 actual values for each model with the model colours shown at the bottom of the figure.

### Shortwave downwelling radiation

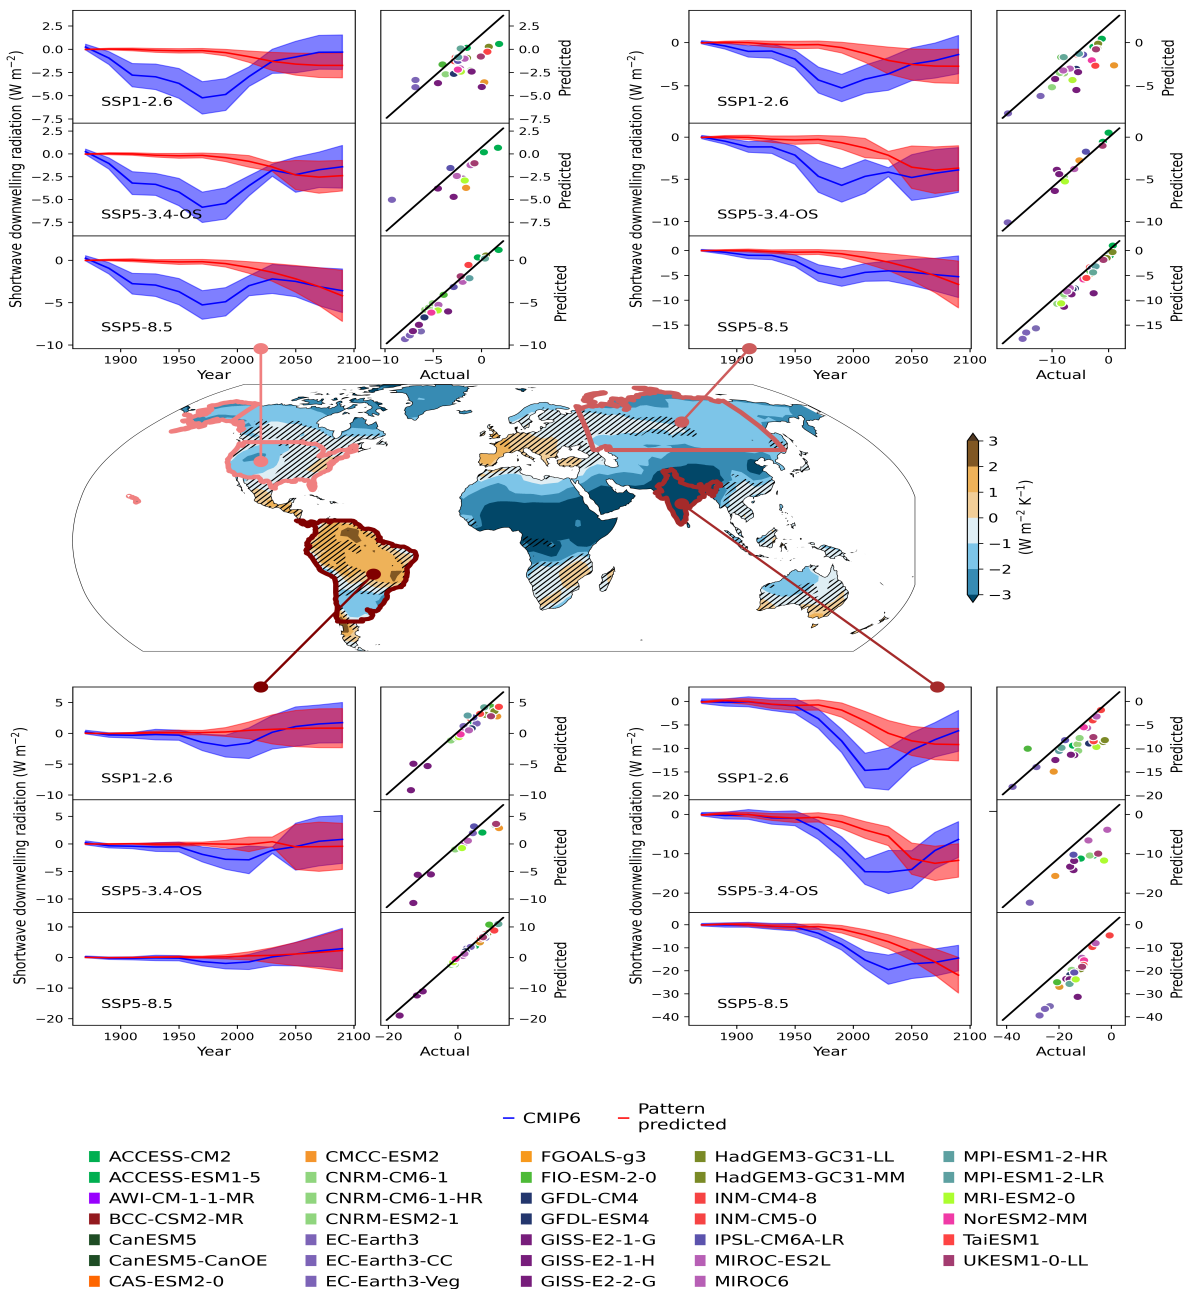

**Figure S8.** The central map shows the shortwave downward radiation pattern (where there is no hatching indicates that the models tend to agree on the sign of the change and with hatching to show where the models tend to disagree on the sign of the change) and subpanels for each region: North America, Siberia, South America and South Asia. The region subpanels show the shortwave downward radiation timeseries (left subpanel) and scatter plots (right subpanel) for each scenario; top: SSP1-2.6, middle: SSP5-3.4-OS and bottom: SSP5-8.5. The timeseries shows the PRIME patterns (blue plume) and the CMIP6 patterns (red plume). The scatter plots show the end of century values predicted by PRIME vs CMIP6 actual values for each model with the model colours shown at the bottom of the figure.

Figure 1 displays longwave downwelling radiation (W m<sup>-2</sup>) from 1900 to 2100 under three Shared Socioeconomic Pathways (SSPs) for two regions: (a) Europe and (b) East Asia. The figure includes a world map showing the regions of interest, a color scale for the radiation change (0.0 to 9.0 W m<sup>-2</sup> K<sup>-1</sup>), and a legend for the climate models used.

The top row shows the radiation change for Europe (a) and East Asia (b) under SSP1-2.6, SSP5-3.4-OS, and SSP5-8.5. The bottom row shows the radiation change for Europe (a) and East Asia (b) under SSP1-2.6, SSP5-3.4-OS, and SSP5-8.5. The color scale indicates the radiation change (W m<sup>-2</sup> K<sup>-1</sup>) from 0.0 to 9.0.

The legend identifies the climate models used:

- CMIP6 (Blue line)
- Pattern predicted (Red line)
- ACCESS-CM2
- ACCESS-ESM1-5
- AWI-CM-1-1-MR
- BCC-CSM2-MR
- CanESM5
- CanESM5-CanOE
- CAS-ESM2-0
- CMCC-ESM2
- CNRM-CM6-1
- CNRM-CM6-1-HR
- CNRN-ESM2-1
- EC-Earth3
- EC-Earth3-CC
- EC-Earth3-Veg
- FGOALS-g3
- FIO-ESM-2-0
- GFDL-CM4
- GFDL-ESM4
- GISS-E2-1-G
- GISS-E2-1-H
- GISS-E2-2-G
- HadGEM3-GC31-LL
- HadGEM3-GC31-MM
- INM-CM4-8
- INM-CM5-0
- IPSL-CM6A-LR
- MIROC-ES2L
- MIROC6
- MPI-ESM1-2-HR
- MPI-ESM1-2-LR
- MRI-ESM2-0
- NorESM2-MM
- TaiESM1
- UKESM1-0-LL

9

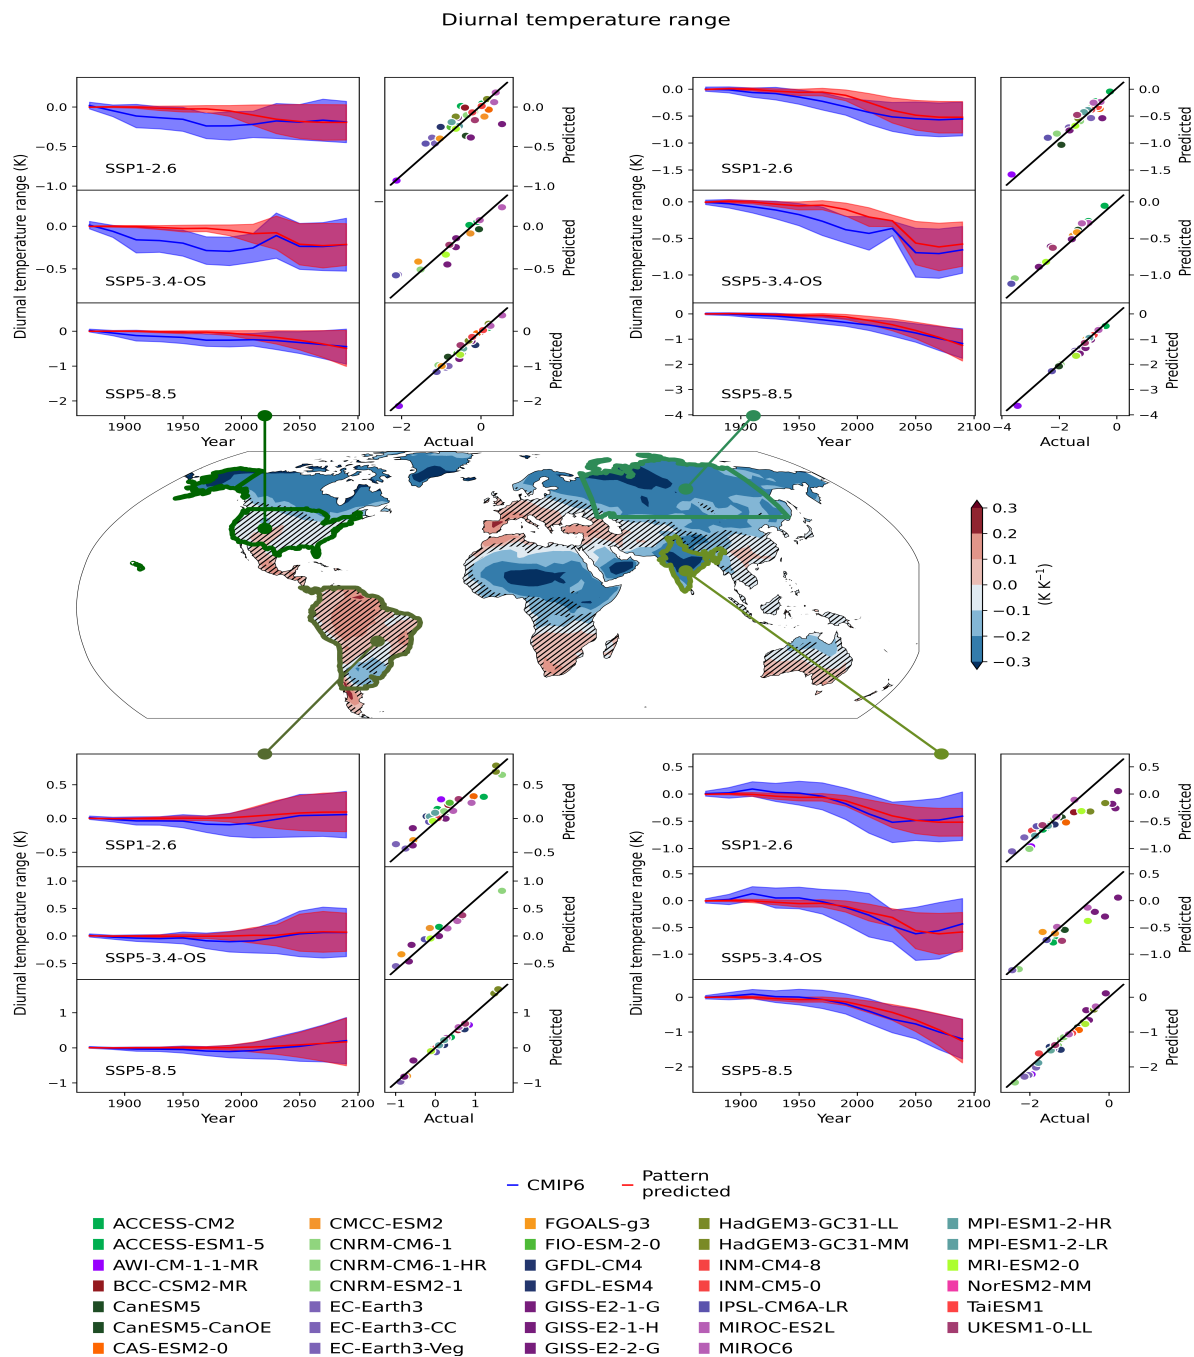

**Figure S10.** The central map shows the diurnal surface temperature range pattern (where there is no hatching indicates that the models tend to agree on the sign of the change and with hatching to show where the models tend to disagree on the sign of the change) and subpanels for each region: North America, Siberia, South America and South Asia. The region subpanels show the diurnal surface temperature range timeseries (left subpanel) and scatter plots (right subpanel) for each scenario; top: SSP1-2.6, middle: SSP5-3.4-OS and bottom: SSP5-8.5. The timeseries shows the PRIME patterns (blue plume) and the CMIP6 patterns (red plume). The scatter plots show the end of century values predicted by PRIME vs CMIP6 actual values for each model with the model colours shown at the bottom of the figure.

#### 4 Evaluation of the JULES outputs

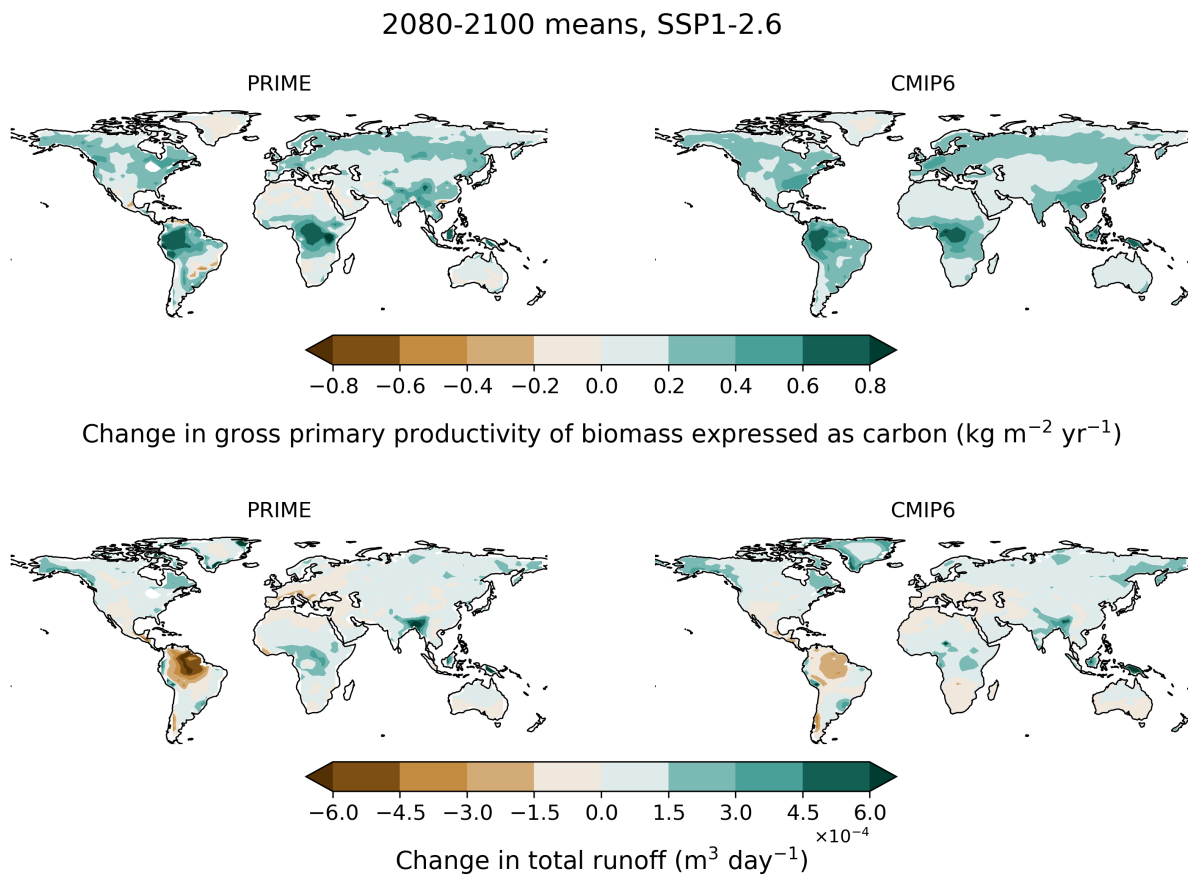

**Figure S11.** Maps comparing the multi-model mean projected end of century changes (2080–2100) for SSP1-2.6 for GPP (top) and runoff (bottom) from PRIME (left) compared to CMIP6 (right)

2080-2100 means, SSP5-3.4-OS

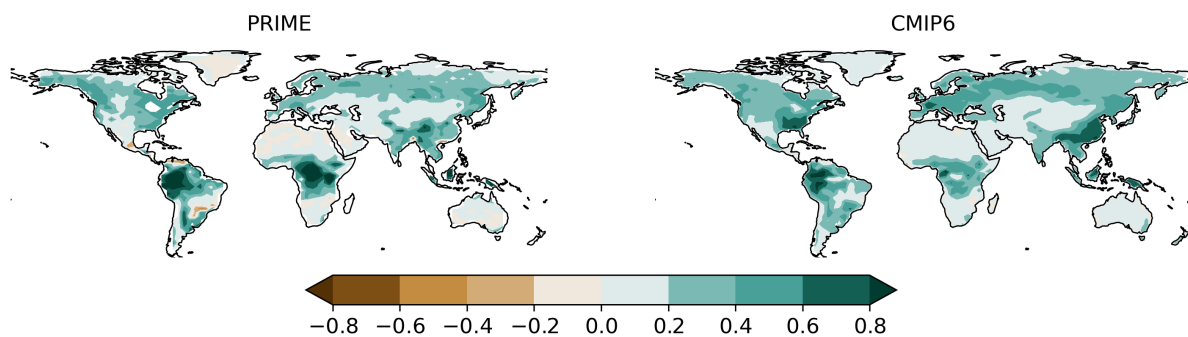

Change in gross primary productivity of biomass expressed as carbon ( $\text{kg m}^{-2} \text{yr}^{-1}$ )

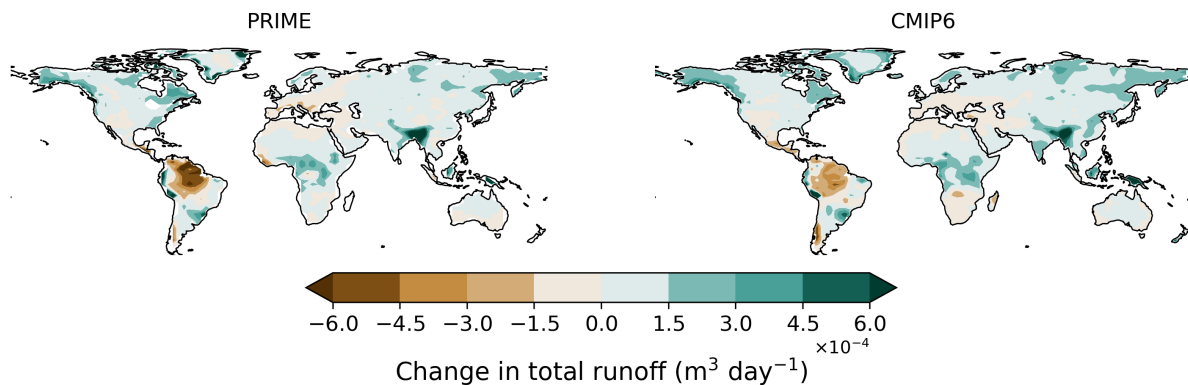

Change in total runoff ( $\text{m}^3 \text{day}^{-1}$ )

**Figure S12.** Maps comparing the multi-model mean projected end of century changes (2080–2100) for SSP5-3.4-OS for GPP (top) and runoff (bottom) from PRIME (left) compared to CMIP6 (right)

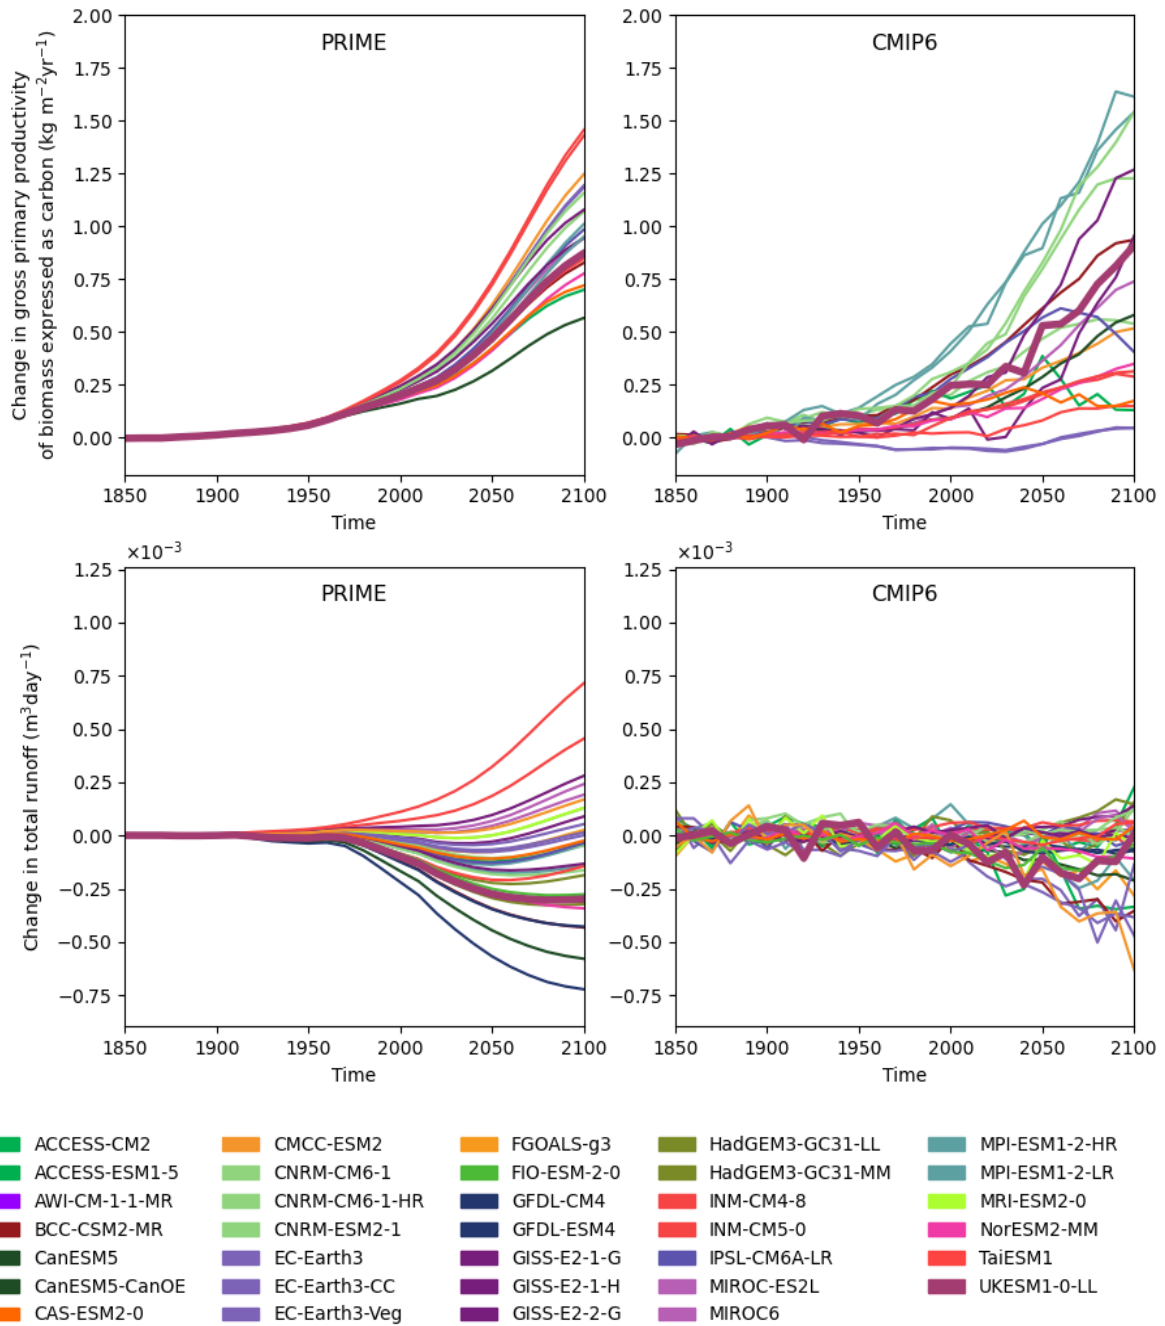

**Figure S13.** Timeseries of the change in gpp (top) and change in total runoff (bottom) for PRIME (left) and CMIP6 (right) for SSP5-8.5 for the Amazon region for each CMIP6 model

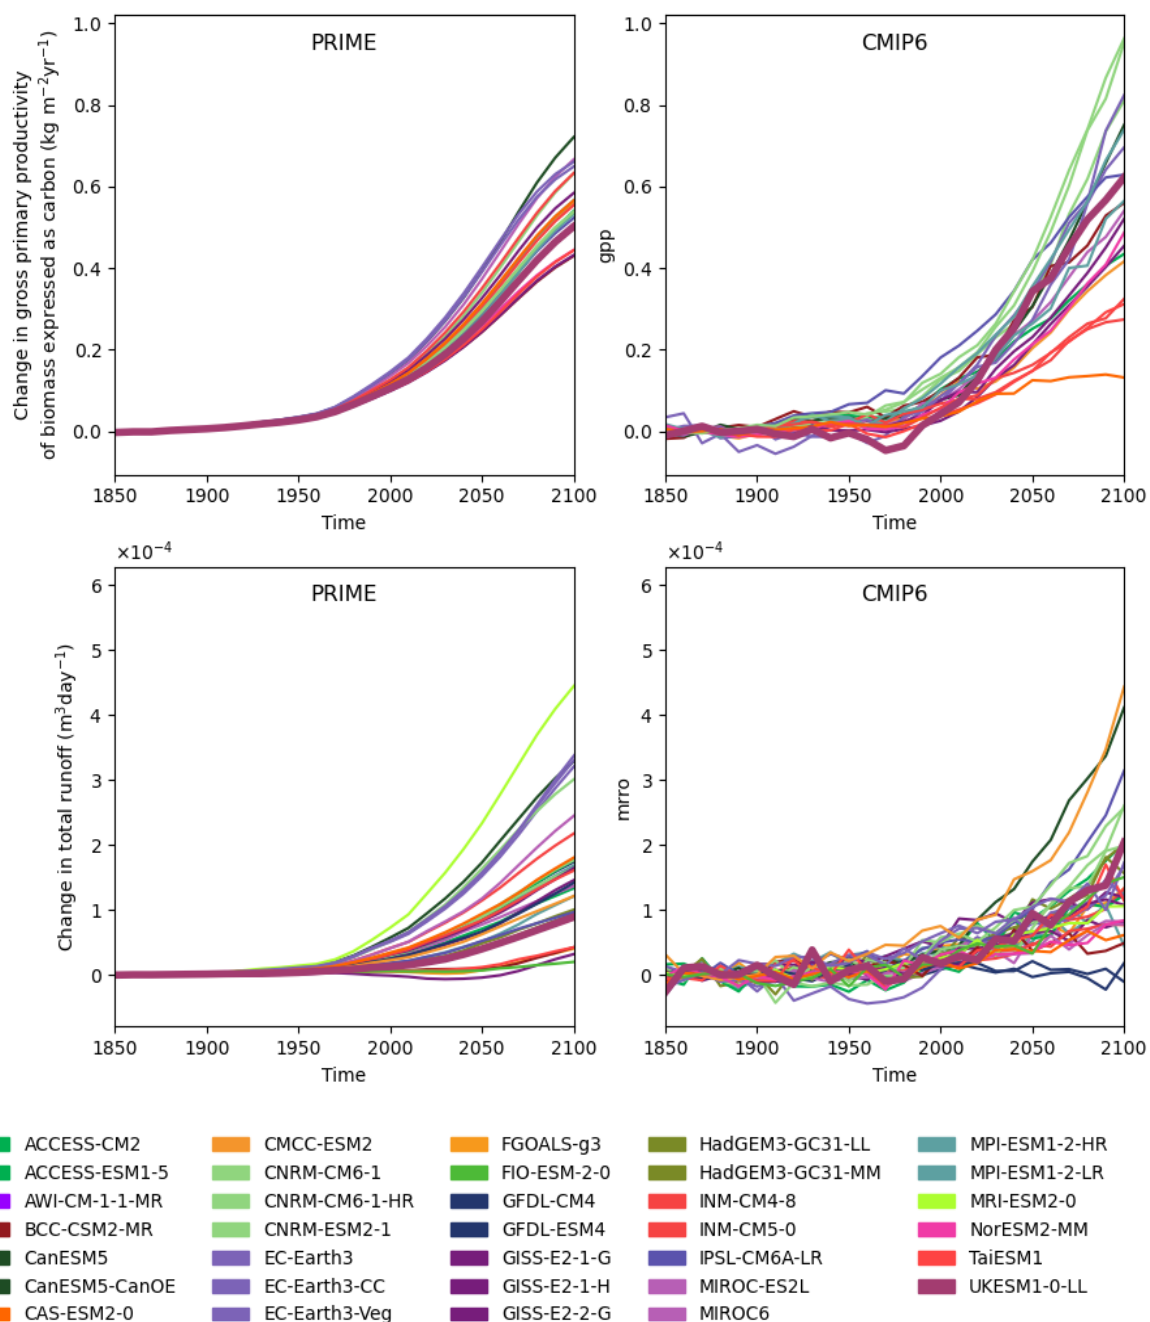

**Figure S14.** Timeseries of the change in gpp (top) and change in total runoff (bottom) for PRIME (left) and CMIP6 (right) for SSP5-8.5 for the Siberia region for each CMIP6 model

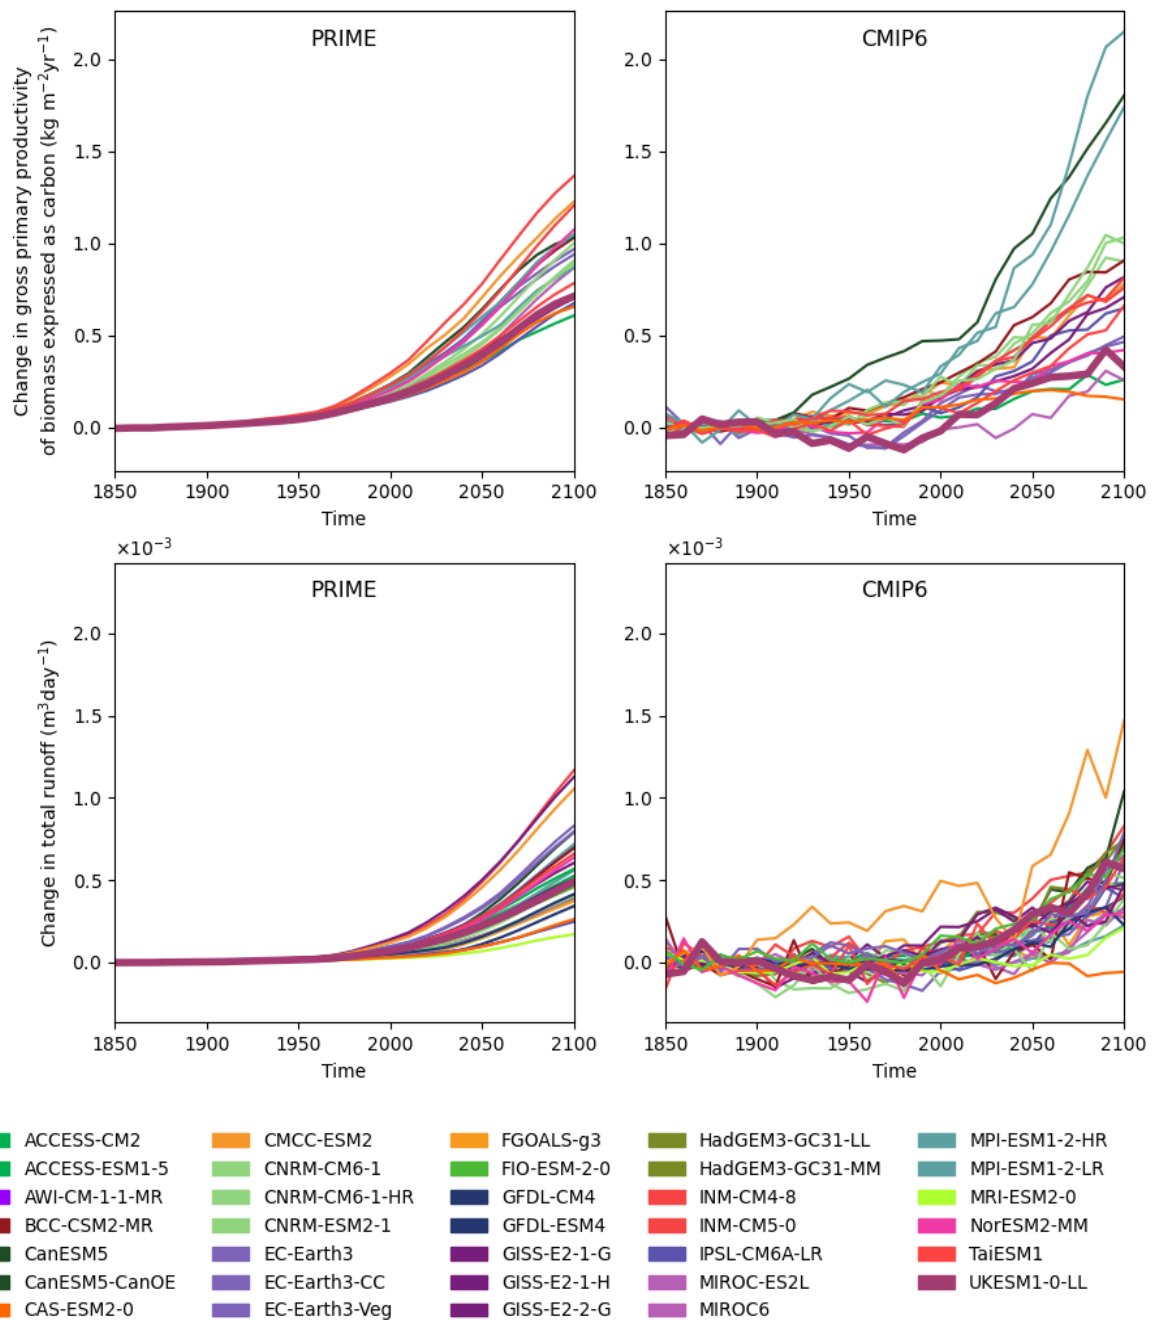

**Figure S15.** Timeseries of the change in gpp (top) and change in total runoff (bottom) for PRIME (left) and CMIP6 (right) for SSP5-8.5 for the India region for each CMIP6 model

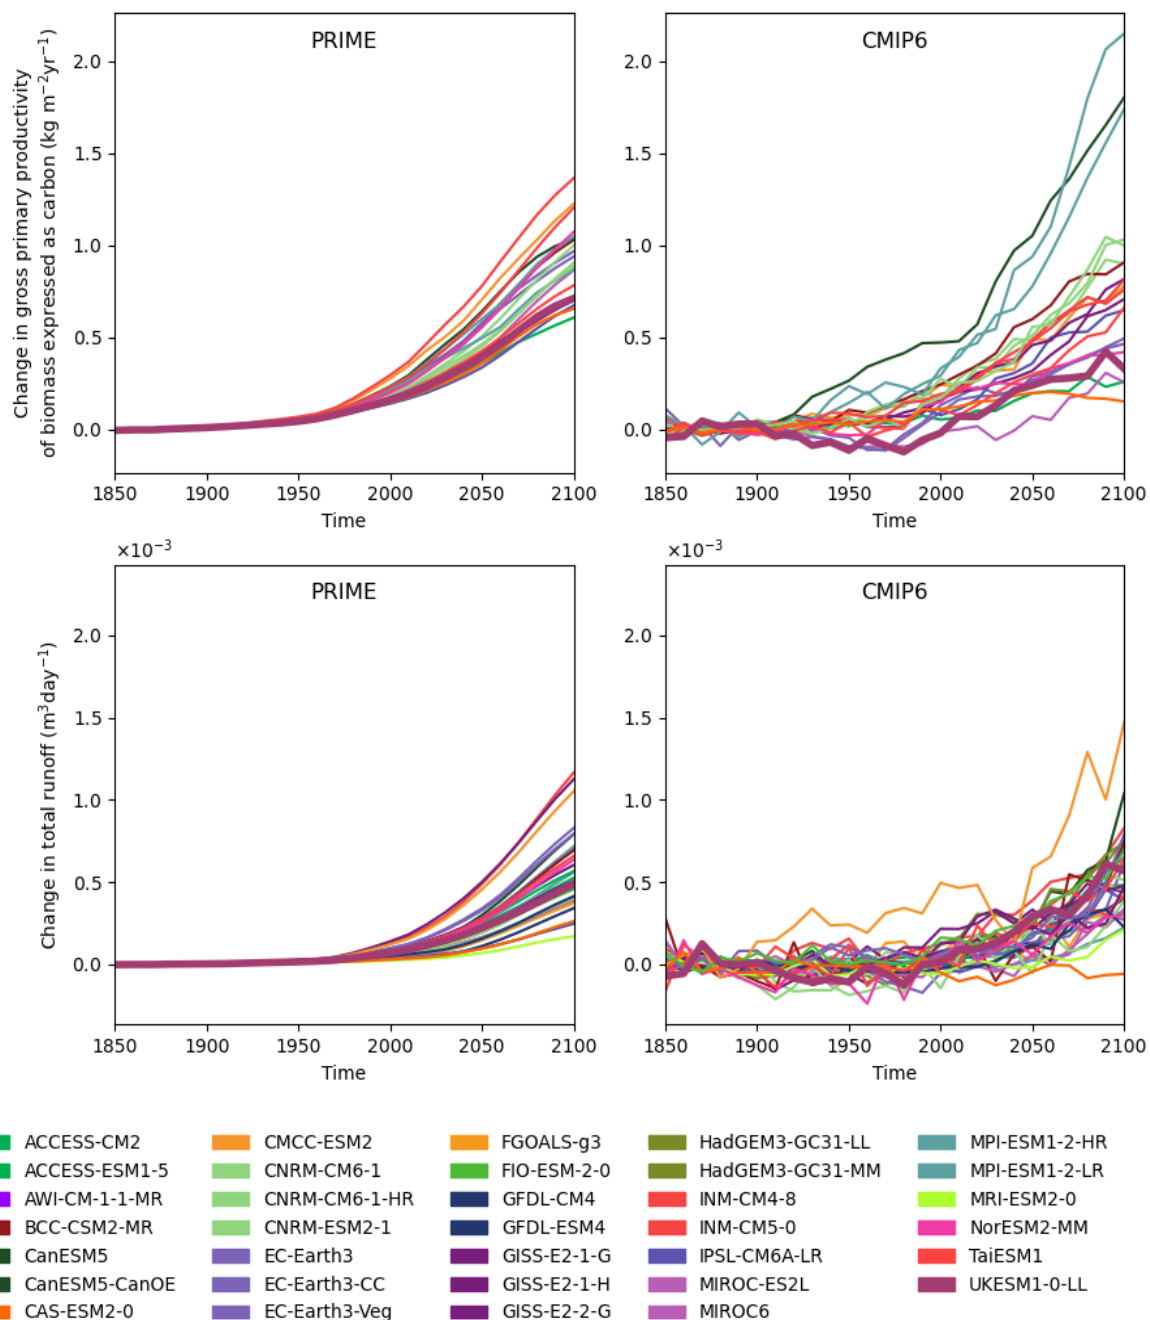

**Figure S16.** Timeseries of the change in gpp (top) and change in total runoff (bottom) for PRIME (left) and CMIP6 (right) for SSP5-8.5 for the USA region for each CMIP6 model

**Table S1.** SSP5-8.5 driven CMIP6 model patterns, selected based on data availability.

|     | Model           | Realisation |
|-----|-----------------|-------------|
| 1.  | ACCESS-CM2      | rlilp1f1    |
| 2.  | ACCESS-ESM1-5   | r3ilp1f1    |
| 3.  | AWI-CM-1-1-MR   | rlilp1f1    |
| 4.  | BCC-CSM2-MR     | rlilp1f1    |
| 5.  | CAS-ESM2-0      | rlilp1f1    |
| 6.  | CMCC-ESM2       | rlilp1f1    |
| 7.  | CNRM-CM6-1      | rlilp1f2    |
| 8.  | CNRM-CM6-1-HR   | rlilp1f2    |
| 9.  | CNRM-ESM2-1     | rlilp1f2    |
| 10. | CanESM5         | rlilp1f1    |
| 11. | CanESM5-CanOE   | rlilp2f1    |
| 12. | EC-Earth3       | r1ilp1f1    |
| 13. | EC-Earth3-CC    | rlilp1f1    |
| 14. | EC-Earth3-Veg   | rlilp1f1    |
| 15. | FGOALS-g3       | rlilp1f1    |
| 16. | FIO-ESM-2-0     | rlilp1f1    |
| 17. | GFDL-CM4        | rlilp1f1    |
| 18. | GFDL-ESM4       | rlilp1f1    |
| 19. | GISS-E2-1-G     | rlilp5f1    |
| 20. | GISS-E2-1-H     | r3ilp1f2    |
| 21. | GISS-E2-2-G     | rlilp3f1    |
| 22. | HadGEM3-GC31-LL | rlilp1f3    |
| 23. | HadGEM3-GC31-MM | rlilp1f3    |
| 24. | INM-CM4-8       | rlilp1f1    |
| 25. | INM-CM5-0       | rlilp1f1    |
| 26. | IPSL-CM6A-LR    | rlilp1f1    |
| 27. | MIROC-ES2L      | rlilp1f2    |
| 28. | MIROC6          | rlilp1f1    |
| 29. | MPI-ESM1-2-HR   | rlilp1f1    |
| 30. | MPI-ESM1-2-LR   | rlilp1f1    |
| 31. | MRI-ESM2-0      | rlilp1f1    |
| 32. | NorESM2-MM      | rlilp1f1    |
| 33. | TaiESM1         | rlilp1f1    |
| 34. | UKESM1-0-LL     | rlilp1f2    |
