# Supplementary material for: A rapid application emissions-to-impacts tool for scenario assessment: Probabilistic Regional Impacts from Model patterns and Emissions (PRIME)
Source: Copernicus journal article supplement (doi:10.5194/egusphere-2023-2932), 2024-02-26
Supplement: Supplementary file [file egusphere-2023-2932-AC1-supplement.pdf]

# Response to reviewers

Thank you to both reviewers for your detailed review of our manuscript. We have responded to each comment in full and outlined the changes we will make to the manuscript to address your comments in this document. Our responses are in black font in response to review comments in blue, and where we quote new text, this is in italic.

## Response to reviewer 1:

Reviewer comments in blue and the response in black below.

The authors propose a global downscaling system based on “pattern scaling” where the global-mean temperature is used to predict local mean values of all variables on a GCM grid, which is then used to drive an offline land model in order to calculate climate impacts. This approach is considerably cheaper than running a GCM and is proposed for generating large ensembles and testing more complete sets of scenarios while still providing regionally specific outputs.

**Author's response:** Thank you for acknowledging this, it is why we are thinking along these lines.

I think this system is worth publishing but have some issues to raise that will require moderate revisions.

**Author's response:** We aim to address these point by point below.

### General Comments

1. The success of the pattern scaling approach is not well tested in my opinion, mainly because most of the tests examine the change by end of the century under the RCP8.5 scenario, which is exactly the same one used to determine the pattern; and the change by end of century will dominate the variance that a max-likelihood linear fit is trying hardest to fit. Thus the success is built in by design and the agreement shown in e.g. Fig. 5 is meaningless. What is needed is an out-of-sample test such as the accuracy at mid-century, and/or for other RCP scenarios—the RCP6 or 4.5 scenarios would seem like the obvious test targets. The time series comparisons (Figs. 6,7) look OK but not great, as there are some errors mid-century that are as large as the signal. This suggests that the pattern scaling approach isn't as accurate as we'd like.

**Author's response:** We only show SSPs in this paper (there are no RCPs used) although we show SSP5-8.5 in the main text, this is for illustration of how we have conducted the analysis. SSP1.2-6 and SSP5.3-4-OS are shown in the supplementary data.

In short, the paper needs to get rid of RCP8.5 tests and instead show tests on at least two other RCPs to give a realistic idea of out-of-sample performance.

**Author's response:** We do 2 things here - we show SSP5-8.5 results to show that PRIME does not introduce any errors and could reproduce the SSP5-8.5 scenario used in calibration; this is the minimum we would hope and expect for this scenario. Additionally we test the system on 2 very different scenarios - Currently the figures for the SSP1-2.6 and SSP5-3.4-OS analysis are in the supplementary data, both of these scenarios are very different to SSP5-8.5, with one being an overshoot scenario. We also include values covering the analysis for each of these scenarios in the tables in the main text. This demonstrates that we broadly capture the CMIP distribution for these scenarios. To address this comment and make this clearer, we will make the signposting to the analysis for these other scenarios clearer in the manuscript and point to the values in the table. We will also move the SSP5-8.5 figures to supplementary and use SSP1-2.6 in the main text.

2. One reason the performance isn't always good, especially on precipitation, may be that the authors are ignoring the direct effects of CO<sub>2</sub> on precipitation which are substantial (e.g. Bony et al. 2013). Past studies show that by combining the effects of CO<sub>2</sub> and global-mean temperature, precipitation patterns can be well captured, but not based on temperature alone. Since the authors are already feeding CO<sub>2</sub> and global-mean T to JULES, why not also use CO<sub>2</sub> as a second predictor for the downscaling?

**Author's response:** Thanks for the comment, the CO<sub>2</sub> response is, of course, implicit in the calibration because it is part of the simulations from which we create the patterns. We discuss limitations of pattern scaling in the discussion and will extend this to bring out future research priorities. Other predictors such as CO<sub>2</sub> but also land-sea contrast will be considered. We will add greater depth to our discussion of limitations and development priorities in the discussion section (this also addresses similar comments from reviewer 2). Specifically in the revised manuscript, we will include discussion of the effect of rising atmospheric carbon dioxide concentrations on tropical circulation and precipitation referring to the Bony et al., (2013) paper and mention the Mitchell et al. (2016) paper that highlights that temperature is not the only indicator for precipitation distribution, which is also affected by non CO<sub>2</sub> forcings (Mitchell et al., 2016). Mitchell et al. (2016) also show that there is not an absolute 1:1 link between global temperature and global precipitation, indicating that even if the temperature stabilises there is a continuing impact on precipitation distribution. This is also something else we would like to explore with this framework in future iterations.

3. I am very confused by the so-called "weather generator" since the text states that the same weather is used for every day of any given month (line 128). If so, that is extremely unrealistic and will produce extreme responses in the land model (since it will either rain every day of the month or not at all). This doesn't sound like an actual weather generator. Little else is said about the weather generator except to cite Williams and Clark 2014—we should not have to look there to get basic information about what kind of weather is being inserted. If indeed the weather is being held constant for a whole month at a time and then switches to something else on the 1st of the next month, this needs to be highlighted as a significant limitation in discussing the results.

**Authors response:** In this framework we use the weather generator that is built into IMOGEN to downscale to the hourly timescale and accurately simulate the diurnal cycle and exchange of heat, water and momentum and to avoid numerical instabilities, this is similar to the disaggregator described in Mathison et al. (2023). The IMOGEN weather generator distributes monthly mean

rainfall subject to a probability distribution that has fixed parameters in time (i.e. year), although dependent on month and location. For each year, a random number generator is applied to sample from the distribution. The distribution parameters are fitted to known historical gridded measurements of precipitation. Precipitation is considered to occur in a single event, with a globally specified duration parameter (6 h for convective rainfall, 1 h for large-scale rainfall and convective snowfall and large-scale snowfall). Convective rainfall occurs when temperature exceeds 288.15 K. Sub-daily downward shortwave radiation and temperature are estimated using known factors such as the position of the sun in the sky and a sinusoidal function to represent the maximum and minimum daily range. Downward longwave radiation is a linear function of temperature, and specific humidity is kept below saturation at each time step. We will add text to the manuscript to say this more clearly.

4. The probabilistic framework being used is not clear from the description. Any probabilities will depend on the priors for example, which are not stated, and on what observations the probabilities are conditioned on which is also not stated. There are also some confusing statements in the text (see detailed comments below). This needs to be clarified if the intention is for this tool to be used for probability estimation. It looks like the pdfs are traced to an ensemble calculated by WGI of AR6 but still the assumptions should be stated here.

**Author's response:** In this paper we are presenting a framework – PRIME – which can, and will, be used in multiple ways. Individual users have to choose their own sampling of all the components from FaIR percentiles to CMIP patterns. There is nothing intrinsic in PRIME which mandates this choice.

Secondly though we will better explain what we have done here – as an example use. We have sampled within the FaIR temperature distribution (but of course we could use other percentiles and/or CO<sub>2</sub> levels). But this is not in itself a limitation of the system. These are not intended to be particular priors in nature and the output is not presented in a probabilistic way.

PRIME can be sub-sampled to reduce the number of simulations and also to create probabilistic output. It is not an intrinsic part of the tool though, and PRIME could be run with all possible combinations of parameters and patterns. As such this documentation paper does not recommend any specific sampling strategy or choice of prior. This is for individual users of PRIME to determine on a case by case basis.

In this paper, we use the AR6 FaIR calibration (fair-calibrate V1.4.0, Smith et al., 2024) which takes into account the observed historical temperatures up to 2015, at which point the SSPs begin. The prior distributions come from a 1.6 million member prior ensemble. This large ensemble is reduced using the historical temperature record eliminating those members with a larger error, with the aim of reproducing the uncertainty range in present day relative to Pre-industrial. We then simultaneously constrain on several observable and assessed climate metrics including ECS, TCR, Aerosol, CO<sub>2</sub> concentration and ocean heat content change. This reduces the ensemble to approximately 2237 members, as used in AR6. We take a selection of ensemble members from a single scenario that are designed to span the range of the temperature change distribution from FaIR and we use these ensemble members throughout to allow comparison between scenarios.

We do not currently use the CO<sub>2</sub> concentration to select the ensembles but we do use it as an input to JULES. We will make this process clearer in the text.

## Detailed/Technical Comments

line 183: by constraining future projections here, do you mean constraining equilibrium climate sensitivity? This is not the same as constraining RCP projections directly (which depend on factors other than ECS, most importantly historical forcings).

**Author's response:** This sentence is correct as it stands. AR6 constrained future projections (of global temperature) refers to the process that was used in AR6. This process included a much broader set of constraints and was not only based on the ECS. See IPCC Chapter 4 (Lee et al), Section 4.3.4. In our calibration of FaIR, however, ECS is not a constraint but an emergent property we include as just one of several factors to define the distribution; the need to use other metrics aside from ECS to describe climate uncertainty was made in Smith et al. (2023) [[Climate uncertainty impacts on optimal mitigation pathways and social cost of carbon - IOPscience](#)]. A more detailed response to this question is given to point 4 above.

line 196: this is stated a bit confusingly—I assume the CO<sub>2</sub> is a forcer to the land model, not to the meteorology (which depends only on global-mean temperature).

**Author's response:** CO<sub>2</sub> is a forcing for the land model in addition to the meteorology. We will clarify this in the text, in which the word “secondary” is confusing.

line 200-202: I don't understand why in your ensemble, CO<sub>2</sub> and ECS would be correlated. I think this is because the important elements noted in Major Point 4 are missing. Even if you are conditioning on historical warming I don't see why a higher future CO<sub>2</sub> would imply a lower ECS. This would only make sense if you were targeting a specific warming, but that isn't stated clearly and you are showing a spread of possible warmings for any given RCP, as occurs in standard GCM simulations where a prior is placed (implicitly and usually independently) on both ECS and carbon cycle parameters and this implies a posterior distribution of temperature at any future time. There are a number of past studies that obtain pdfs of future warming conditional on historical warming using EMICs, and this study should follow a similar approach; most of them use the GCM ECS distribution as a prior but some use observationally-constrained priors on ECS.

**Author's response:** As noted above, we will clarify that PRIME can be used to sample anywhere within the distribution of FaIR outputs and climate patterns and used for any scenario. As a framework there is no constraint on the assumptions or priors chosen. The optimal sampling strategy can and will vary on a case-by-case basis depending on the desired use of the tool. We will explain better in the text the choices we have made, but also stress that these choices are not intrinsic to PRIME as a tool.

Fig. 3: y axis or caption needs to identify at what time the CO<sub>2</sub> concentration is determined.

**Author's response:** We will make it clearer that the CO<sub>2</sub> concentration and the temperatures relative to 1850-1900 are both defined at 2100.

Fig. 4: upper right figure panel needs to specify what humidity it is (specific humidity, according to the text).

**Author's response:** We will modify the label to say specific humidity

line 220-222: I think what this text means is that you are correlating the decadal means of the predicted vs. CMIP variables—please state clearly. I would not say the correlations are very good for precipitation, wind etc., since much of the map is around .4 or less which means only 20% of the variance is captured by the emulator.

**Author's response:**

We will clarify these lines in the text, which do describe correlating the decadal means of predicted variables against CMIP variables.

## Response to reviewer 2:

Reviewer comments in blue and the response in black below.

### General Description:

The authors present a combination of three existing model approaches – a global climate model emulator (FaIR), a traditional pattern scaling approach, and the JULES land model. They term this chain of models PRIME, suggesting that "PRIME correctly represents the climate response for [these] known scenarios,..." and that "PRIME enables the state-of-the-art science to be used throughout the modelling chain starting from the latest scenarios all the way to the simulations of regional impacts."

**Author's response:** Thanks for this comment. In general when we talk about PRIME we use the term Framework more often than Tool because it does indeed comprise a series of components run in sequence. We propose keeping the title as it is, but amend the language in the paper to explain that a stand alone tool is the general ambition and direction of travel for this framework. A high priority technical development is to set up a PRIME rose suite that will allow the framework to be run in an automated way. However, it is possible to reproduce the analysis presented here with the data and model information we are providing as part of this submission.

### Overall Comment:

If the paper were presented with a heading like "Pattern-scaling approaches to drive JULES" or something similar, then I think it would be a great addition to the scientific literature – as it is a fine example of how the chain from global emission scenarios to some land-based impact metrics can be made with a number of (simplified) assumptions. However, the paper presents itself as playing in a different league, e.g., to "bypass ESMs" (line 66), or implicitly suggests that ISIMIP bias-corrected ESM outputs could be replaced (lines 25 to 40ff). With these heightened expectations, I'm sorry to say that the paper is underwhelming.

**Author's response:** Thanks for drawing our attention to this, we are disappointed by this comment, but I think this was more as a result of our enthusiasm for the framework and project than intentionally overstating the capability. However, to address this we will look to tone down the language we use and expand on the limitations of the approach currently mentioned in the discussion (Line 362-376). This modification to the text may mean that we add a section on the limitations and development opportunities for this framework during the editing of the manuscript.

We respond to the individual reasons below:

The reasons are:

- The chosen method to justify the adequateness of pattern scaling (e.g., Fig 4): The authors show the Pearson correlation coefficients between scaled patterns (derived apparently from a linear regression of CMIP6 output against global mean temperature) and the CMIP6 data. I am very confused about this choice, i.e., to use a Pearson correlation coefficient for "Evaluation" (see e.g., caption of Figure 4). Suppose there is no change in regional precipitation in a specific region under climate change. If the pattern scaling "gets it correct" and indicates zero changes for those grid points, the applied Pearson correlation coefficients would be around zero (as there is no linear relationship then between pattern scaling and CMIP6). Thus, authors should use either standard RMSE (see Chapter 3 of IPCC AR6 WG1) or other useful metrics – or explicitly justify their use of the Pearson correlation coefficients.

**Author's response:** We respond to this comment below as this comment also relates to the next comment.

- Unclear p-values and low skill for 5 out of 8 variables: In Figure S2, the authors show the percentage of p-values, averaged over models and months. First, I couldn't find any statistical description of what null hypothesis was tested. That there is no climate change? The authors are strongly urged to complement the paper with a detailed statistical section that both illuminates their suggested uses of Pearson correlation coefficients (or ideally other evaluation metrics) and the p-values here in Figure S2. On the substance of it: Only three out of the eight variables are shown to have satisfactory 'p-values' of <0.05 (whatever exactly was measured here). How can the authors claim the low percentages of <0.05 p-values (take e.g., Northern Europe or North America precipitation changes) as an indicator that "PRIME correctly represents the climate response for these known scenarios" (Abstract, line 16f.). That seems a really far-fetched conclusion given the presented results in Figure S2 and Figure 4, which seem to suggest that for precipitation, the PRIME pattern scaling results are essentially useless for many key world regions.

**Author's response:** Here we respond to both of the previous reviewer 2 comments on the evaluation of the patterns.

We agree that our evaluation of the pattern scaling using Pearson correlation coefficients could be improved through the use of alternative metrics. On this basis, we will find more appropriate and descriptive metrics for the evaluation, and ensure that we clearly distinguish our analysis of pattern scaling performance on other scenarios versus the one the patterns were fitted against (SSP5-8.5).

Figure 4 and S2 were intended to summarise the general performance of temperature as a predictor for each of our meteorological variables across all the model patterns, but we accept that in trying to condense the analysis into one figure, this is confusing and is therefore the opposite of

the useful summary it was supposed to be. Therefore, we will replace these figures with ones that break down the pattern scaling evaluation in more detail, with clearer metrics and language in the analysis.

We will present analysis to demonstrate the pattern scaling's ability to capture the variance and mean of the CMIP6 ensemble for each scenario, variable, and for each month on which the patterns were trained. We will highlight more clearly the variables for which the patterns do well and also those where they do less well and explain why we still use them. In particular, we know from previous analysis of the input variables for JULES that there are some variables that are more important for JULES. For example, temperature, precipitation and specific humidity are key drivers with other input variables like wind speed, pressure and longwave downwelling radiation having less influence. The revised evaluation of the patterns may take the form of an example plot using (RMSE and mean response for the multimodal ensemble for a given month) with others available in a Zenodo repository. We will also revisit the maps that show the difference between the predictions and CMIP6 values at the end of the century and the data in the tables to ensure their meaning is more transparent. In future work, we would also like to explore how including patterns for all of the JULES input variables affects the outputs from PRIME in a sensitivity analysis.

- Almost the same as a study from a quarter-century ago. As the authors state, PRIME is very similar to the year 2000 pattern scaling approach by Huntingford and Cox. Indeed, the two papers have almost a very similar scope, using the TRIFFID model instead of JULES. And arguably, the study from almost half a century ago uses more elaborate timeseries plots and statistics to showcase the merit (despite the general strong limitations of pattern scaling for the majority of variables).

**Author's response:** Thank you for the comment, the reviewer is obviously aware of the literature of pattern scaling over many years and will know that the current authors – one of whom led the first IMOGEN study - have been central to the development and use of IMOGEN in multiple studies since the initial Huntingford and Cox (2000). PRIME represents a logical evolution of the IMOGEN pattern scaling tool – each component can be optimised and developed, and we agree with the reviewer that such a tool is a very valuable addition to the research community.

In response to this comment, we will more clearly present the history of this framework and its connection with the previous work of Huntingford and Cox (2000). We will explain more clearly in the text why PRIME is a new development that builds on the work of Huntingford and Cox (2000). These will include highlighting the following:

- Specifically, in this current paper the energy balance approach of IMOGEN is now replaced by FaIR which enables it to draw on a wide research community of reduced complexity modellers, and pick up developments to FaIR from across this community. The current use in PRIME enables direct linkages to the extensive work which calibrated FaIR for use in IPCC AR6. This is a substantial strength over IMOGEN. FaIR incorporates the latest science from AR6, including a broad range of gas species which influence the global temperature. For example we are able to incorporate representation of short lived forcers like methane and short-lived halogenated compounds, such as hydrofluorocarbons (HFCs), hydrochlorofluorocarbons (HCFCs), nitrogen oxides (NO<sub>x</sub>), carbon monoxide (CO), non-methane volatile organic compounds (NMVOCs), sulphur dioxide (SO<sub>2</sub>), and ammonia (NH<sub>3</sub>). This means we are not restricted to only including the influence of CO<sub>2</sub>.

The pattern scaling approach is inspired by and based largely on the code in IMOGEN, which is very much the same as Huntingford and Cox (2000), but linking this existing modelling capability with JULES and FaIR in this way is a first and substantially increases the range of variables that we can consider using from this framework.

- The pattern scaling technique for now is the same as used previously, but now updated to use CMIP6 models. Previously this laborious step was carried out manually. We now automate this and make the ESMValtool recipe freely available.
- The patterns themselves of course have evolved significantly from “a quarter of a century ago” and now represent the latest state-of-the-art ESMs from CMIP6. As a framework these can now be easily updated with future CMIP generations too.
- JULES has evolved substantially from the land model used in that study too, now representing much improved plant physiology, hydrology, vegetation types and river flow (Mathison et al., 2023 ISIMIP paper). PRIME as a framework enables rapid use of the latest science in JULES to be pulled through as and when further developments are implemented, such as fire and permafrost.

Overall we are unashamedly excited by the potential of this tool, and do not see its heritage back to Huntingford and Cox as a weakness.

- Science has evolved since 2000. Probably most fundamentally, I am concerned about the following point. For many of these five variables, the literature is far more progressed and established that simple pattern scaling does not work satisfactorily. It works like a charm for regional mean temperature, even extremes to some extent, but not for precipitation, wind, pressure, etc.
  - Take for example precipitation. As Allen and Ingram pointed out in 2002 (<https://doi.org/10.1038/nature01092>), or Andrews et al., 2010 (<https://doi.org/10.1029/2010GL043991>), the hydrological cycle underlies various constraints, but is not only driven by global or regional surface air temperature changes. The vertical changes in the troposphere’s energy budget, i.e., the GHG radiative forcing itself as well as the aerosol cloud interactions, have a substantial effect on precipitation.
  - Take for example wind and storm tracks: The key feature is that midlatitude storm tracks might move poleward due to a broadening of the Hadley cells (<https://doi.org/10.1038/s41561-017-0001-8>). That is fundamentally at odds with simple linear pattern scaling, which scales the response at one location just up.

**Author’s response:** Thank you for this comment. In the IPCC AR6 (sec 4.2.4 on pattern scaling) they acknowledge that precipitation can be pattern scaled – the slow response of precip is forcing-independent, and the fast response is not significant for all forcings (e.g. solar), but issues (esp. with aerosols) do indeed complicate things. As such AR6 used the epoch/time-shift approach. This is a possible avenue for future generations of PRIME, but for now we continue to use the established pattern scaling approach. Our results show that precip patterns and the variations across individual CMIP models are well captured on a regional basis for all 3 scenarios, especially in the latter half of the century. Figure 7 has detailed regional, time profile and model-by-model results which are summarised in the statistics in Table 3. We believe this is compelling evidence that PRIME captures general trends and importantly the spread between models for future precipitation changes in different world regions under very different scenarios.



To address this in the manuscript we will include a section on limitations of PRIME, including pattern scaling, and future development priorities which include:

- A call for fuller evaluation of pattern scaling approaches – including aspects such as winds, or snow cover where shifts may not scale with global T. An intercomparison of models like PRIME and MESMER would be a valuable addition to the literature.
  - Use of multiple predictors such as land-sea contrast for slow evolving processes, and maybe CO<sub>2</sub>, aerosols for their direct effects. Ongoing research into land-use and direct regional biophysical effects will also be brought into PRIME.
  - Alternative techniques to pattern scaling including epoch/timeshift (Herger et al. (2015), Schleussner et al., 2016; King et al., 2017) as adopted by IPCC for GWLs.
  - AI and ML techniques offer big advances in deriving down-scaled and interpolated data. For both pattern scaling and weather generation we expect substantial advances and PRIME is well positioned to exploit them.
- 
- The somewhat poor alignment of PRIMAP results with observations for the historical period underscores these fundamental shortcomings of pattern scaling when venturing outside temperature, specific humidity, and longwave downwelling radiation (which is not too different from lower tropospheric air temperature). Similarly to Huntingford and Cox (2000), Zelasowski et al. (2018), and others, the skill of regional precipitation patterns remains very low to the extent of not being very useful.

**Author's response:** While we agree that precipitation does not pattern scale as well as temperature, Figure 7 shows that for some regions the predictions are within the range of CMIP6 models especially when looking at end of century values. See response above to comments about pattern scaling of precipitation in AR6.

- PRIME is not open source, as the underlying JULES code is not open source, if I understand correctly.

**Author's response:** JULES is going through a process to become open source so I hope to be able to update this with more information and reassure this reviewer that PRIME will shortly be fully open source.

- PRIME does not seem to be a tool in itself. In the code availability section, unless I overlooked it, there is no PRIME code available. The pointers are to the underlying energy balance model, to the ESMVALtool (which has tons of functionality beyond patterns), and to JULES (upon request). Thus, the paper seems to describe a sequence of how to apply three other models in sequence. Yet, PRIME is described as a 'tool' itself. What am I misunderstanding?

**Author's response:** See response to comment on the general description above, the aim is for this to be a framework that can be easily rerun to reproduce the results shown here. We are working toward this as a priority but it does not preclude publication of the current PRIME framework and results.

## Overall Recommendation:

If the authors undertake major revisions, possibly a combination of back-scaling the bold expectations that they raise among readers, with additional strong skill statistics and an extensive set of limitations, I think the paper can be a very valuable contribution. That is because systems like the proposed PRIME one are definitely needed. The demand for probabilistic climate impact projection systems is definitely there. However, the paper has to be honest about the various shortcomings, rather than claiming that it correctly represents the climate projections of CMIP6 models (e.g., line 16 and similar at many other places). The system that Huntingford and Cox (2000) described was not too dissimilar, to be frank.

**Author's response:** Thank you for this comment, please see response above to similar sentiment in the general comments.

## Detailed Comments:

- Line 15: 'which was used to define patterns'. A stricter delineation into "training" and "verification" data throughout the manuscript would be appreciated. For example, it is not clear whether Figure 4 is based on the SSP5-8.5 data or not. It better not be.

**Author's response:** While we train on SSP5-8.5 and use this scenario mainly to show that there is no odd behaviour introduced by the framework, we specifically test on scenarios that are very different in SSP1-2.6 and SSP5.3-4-OS. We will therefore remove from the manuscript any figures that show SSP5-8.5 and put these figures in the supplementary information, replacing them with figures that show SSP1-2.6.

Overall, we will revise the manuscript to ensure figures/results are appropriately described drawing a clearer distinction where we are describing the patterns versus where they are being evaluated.

- Line 19: 'being used for impact assessments'. The monthly average patterns are maybe sufficient for some impact patterns, but a simple pattern scaling approach that, for example, completely loses the covariance between temperature and precipitation extremes is not useful for all impact studies. As mentioned above, a bit more precise wording would be appropriate (or a bit more humbleness, or both).

**Author's response:** As mentioned above, we will go through the manuscript and update the language as appropriate.

- Line 47 ff.: A more comprehensive discussion of the many similarities and few differences to the rich history of pattern scaling approaches seems useful. Certainly the 1999 Huntingford & Cox study, the Mitchell review paper, etc.

**Author's response:** As stated above, we will include a section in the resubmission to recap on the lineage of the PRIME framework. As some of the same authors of those studies, we are well aware that this represents an evolution of ours, and others', previous work. We do not pretend to have

invented the subject here. Some of the history of IMOGEN will be included either in the manuscript or supplementary information using these references:

- Combining the GCM analogue model with the JULES land surface model to create a full land impacts system. That's : DOI10.5194/gmd-3-679-2010
- A first attempt at fitting to the non-UK ESMs was with CMIP3, here: DOI10.5194/gmd-11-541-2018
- Pattern scaling from Mitchell et al. (2001)

- Line 66: 'Bypassing ESMs' is strong wording – and I would say inappropriate. At best, the proposed approach can approximate a few key characteristic outcomes of ESMs.

**Author's response:** We will look to rephrase this to explain that this framework is intended as a first look at the scenarios where ESM simulations have not yet been run or will never be run because the ESMs require so much more in terms of resources (including setting up and inputs). Therefore this framework could actually inform which scenarios the ESM simulations should or could run.

- Line 73: 'PRIME enables the state-of-the-art-science throughout the modelling chain'. It would be good if the authors can explain that a bit better, specifically with regards to changes in variability, compound risks, etc. (Or choose less hyperbolic wording).

**Author's response:** We will rephrase this to explain that PRIME facilitates faster pull-through of state-of-the-art science to propagate from the latest scenarios and regional climate change patterns (from the latest ESMs) to the simulation of regional impacts.

- Line 109ff: So, if I understand the method correctly, only 9 runs are undertaken with the energy balance model – scanning the stated percentiles (BTW: It would be interesting to hear how high the author's confidence is in the min-max values, the 0% and 100% percentile). In general, I think the methods section needs to be much expanded, and the authors should clarify how exactly these 9 EBM runs are combined with various patterns? Also, how does the methodology cater for hot and dry futures versus hot and wet futures? Is any covariance preserved across the variables?

**Author's response:** In PRIME we have the full ensemble of FaIR runs from AR6 which consists of 2237 ensemble members. PRIME as a framework is not constrained to any choice of prior or sampling, but in the interest of keeping the PRIME ensemble to a manageable size for this paper we select 9 of these that are representative of the temperature distribution and span the range of uncertainty in temperature from FaIR.

As outlined in Section 2.2, we apply the output from FaIR as a scaling factor to each of the patterns from 34 CMIP models. We generate the patterns separately from the CMIP models using the code provided in ESMValTool. We then use the IMOGEN code within JULES to generate 3-hourly data with which to run JULES. This means that PRIME is run for *each* CMIP pattern individually (we do not run it using the average CMIP pattern). And so explicitly it considers all combinations of GCM output for hot/wet and hot-dry combinations. We will make this clearer in the text.

- Line 115 et al: As mentioned above, the methodology description does in its current form not allow reproducing the study. I would argue it should – even though the code is allegedly provided. For

example, over which time window was the regression undertaken? Including all points from 1900 to 2100 or just the last twenty years from 2081-2100 in the SSP5-8.5 run?

**Author's response:** See response above in which we state that we intend to generate a PRIME Rose suite that will enable anyone to run PRIME, this is a work in progress. We will add to the methods section that the regression was calculated with points from the duration of SSP5-8.5, from 2015-2100. The patterns calculation from the CMIP6 model data is available to run as an [ESMValTool recipe](#), as cited in the code availability section.

- Line 205, Figure 3: How does this plot show the validity of the chosen approach? Even though the underlying energy balance model is able to produce a joint probability between CO2 concentrations and global mean temperature, the sampling of the 9 percentiles is only sampling a fraction of the distribution in the CO2 concentration dimension?! The sampled CO2 concentrations in PRIME span 950ppm to 1100ppm, while the energy balance model output suggests a range from 800ppm to 1200ppm?! In some regions (such as the Amazon), an 800ppm or 1200ppm CO2 concentration might well produce a different physiological plant response, yet the probabilistic PRIME model does not seem to propagate that information forward?

**Author's response:** As stated above – PRIME can sample any/all – we show here results where sub-sampling was kept to a tractable level. But yes of course any specific study can and should sample appropriately. In this study we focused on the temperature distribution as a first attempt at the approach, but we also felt that we should be transparent and point out that in carrying out the selection with a focus on the temperature distribution, we do not capture the full spread of the CO2 distribution and this should be mentioned.

- Line 230, Figure 5: If SSP5-8.5 data is used to derive the PRIME patterns, it is hardly a useful comparison to show a comparison between SSP5-8.5 CMIP6 and PRIME. That is like showing training data as independent verification, which misleads about the skill of the model.

**Author's response:** We use multiple SSPs to evaluate PRIME. These are shown explicitly and discussed in the manuscript and supplement. Figure 5 will be swapped to one of the other scenarios currently in the supplementary information.

- Line 238 and vicinity: The authors just skim over the fact that when compared to other scenarios that are not used for deriving the patterns, the skill gets worse (partly understandable because of the lower signal-to-noise ratio in lower scenarios). The authors need to unpack that with quantifiable information and more details (i.e., which periods, which models were looked at, what is the difference across CMIP6 models, how is the transient skill before the end of the century, etc.).

**Author's response:** The different skill for other scenarios is quantified in the tables and suppl. Plots. Temperature timeseries for all 3 scenarios and 4 example regions are shown in figure 6 and precip in figure 7. Other variables are in the supplement. Tables 1-3 also show quantitative info across scenarios and variables.

- Line 238: When the authors write: 'However, the high correlations and low RMSE give us confidence to apply the pattern scaling...' I am not sure what 'high correlations' the authors refer to? The SSP5-8.5 ones from which the patterns were derived or the lower SSP scenario ones? If the former, then the high correlations should not give confidence to anyone that the model is skillful

outside its training scope. If the latter, then the detailed plots in the supplementary are providing the usual picture that linear pattern scaling provides: That it is very good for some variables, and absolutely unusable for others. For example, Figure S8 on shortwave downward radiation shows the 'prime' (pardon the pun) example, where pattern scaling with global mean temperature does NOT work.

**Author's response:** Please see our response regarding revision of the evaluation of the patterns noted above.

- Table 1: It would probably be useful to the reader if the RMSE values are put into the context of the mean change of the respective variables.
- Table 1: The Pearson correlation coefficients that are stated seem oddly high and I can't reconcile them with the regionally disaggregated ones shown in Figure 4. For example, take precipitation in Figure 4... judging from the color scale, the global-mean Pearson correlation coefficient (if it were meaningful, see above) would be somewhere between 0.3 and 0.7. Yet, the results for all three SSPs show values well above 0.83 in Table 1, even 0.97 for SSP5-8.5!? Please append with much more methodological detail and/or code of what exactly was done. And please explain, why those are consistent.

**Author's response:** During revision, we will revise the evaluation section. The RMSE values are our principal evaluation metric and we agree the mean change would be useful alongside. We will extend this to all the evaluation tables. We acknowledge some variables do not pattern scale well. However, we find that for our selected 'impact' metrics the framework performs well.

- Line 313: 'These comparisons allow us to confidently use the PRIME framework to assess impacts..' – Again, I think this is another example of slightly overconfident language that does not appropriately reflect the various limitations.

**Author's response:** See previous responses explaining that the authors will add more information on the limitations of the method and revise the language where appropriate.

- Line 317: The authors write: "Hence it is novel to show a full probabilistic range of the possible spread of simulated carbon balance (represented by NEP)". See above. I have my doubts, whether 'full probabilistic' is the right term here.. as e.g., the CO2 concentration uncertainties do not seem to be explored according to Figure 3.

**Author's response:** We will look at rephrasing this to explain that we only properly sample the spread of the temperature distribution.

- Line 359: The MESMER tool showed some improvements for surface air temperature when using additional predictors. That regional surface air temperature is the variable that is stunningly well already predicted with a pattern scaling approach. Nobody challenges the usefulness of pattern scaling for monthly mean regional temperatures. The authors seem to want to suggest here though that this marginal improvement would also be true for pattern scaling more generally. Really? I highly doubt it given the literature on scaling regional precipitation, for example, where GHG forcing, (regional) aerosol forcing have clearly been shown to not only provide marginal improvement but are vital predictors without which precipitation cannot be adequately projected (see above).

**Author's response:** Thanks for this comment, which we agree with. This speaks to PRIME being a framework as opposed to a modelling protocol. A user could replace pattern scaling with a regional climate emulator of their choice. Incidentally, we were pleasantly surprised with the fairly good

performance of pattern scaling for precipitation, and as a first demonstration of the process chain will retain its use in the paper. Of course, other more sophisticated emulators exist (PREMU, MESMER-M-TP, fldgen 2.0) that will probably do better for precipitation. In fact, a rapid impacts model intercomparison project, FastMIP, is in progress that will investigate some of these questions. Providing that the driving climate data for the regional emulator is a combination of outputs of FaIR (or any other simple climate model) - generally global mean surface temperature and the radiative forcing from particular greenhouse gases, aerosols, and natural forcings, then any regional emulator could be used. This still may be insufficient for downwelling shortwave radiation which depends partly on the regional pattern of aerosol forcing.

- Line 384: The authors write “Overall we have shown PRIME faithfully reproduces the climate response... “. If authors would phrase this conclusion to something like “Within the known limits of the linear pattern scaling approaches, we have shown that 3 out of the investigated 8 variables can adequately be projected in their individual monthly means’... or similar, I would have no issue with it. But conclusions like the one above are way overconfident in my view.

**Author's response:** Thank you we will revise the concluding statement to better represent the limitations of the methodology.

- I can see how much dedicated work went into this manuscript, which is why I apologize that I cannot be more positive. With major revisions, I think this manuscript can add a useful contribution to a very important field – but the current form of the manuscript requires an overhaul from multiple angles in my perception.

**Author's response:** Thank you for the detailed review.

## References to add to the paper and used in this response:

Smith et al. (2024):

<https://egusphere.copernicus.org/preprints/2024/egusphere-2024-708/egusphere-2024-708.pdf>

Smith et al. (2023): [Climate uncertainty impacts on optimal mitigation pathways and social cost of carbon - IOPscience](#)

Mathison et al., 2023: [GMD - Description and evaluation of the JULES-ES set-up for ISIMIP2b \(copernicus.org\)](#)

Huntingford, C., Cox, P. An analogue model to derive additional climate change scenarios from existing GCM simulations. *Climate Dynamics* **16**, 575–586 (2000).  
<https://doi.org/10.1007/s003820000067>

Bony et al., 2013: <https://www.nature.com/articles/ngeo1799>

Mitchell et al., 2016: <https://www.nature.com/articles/nclimate3055>

Mitchell et al., 2001: <https://crudata.uea.ac.uk/cru/pubs/thesis/2001-mitchell/timm.pdf>
